# Supplementary material for: Exploring the role of EBV in multiple sclerosis pathogenesis through EBV interactome
Source: Front Immunol. 2025 Apr 2;16:1557483. doi: 10.3389/fimmu.2025.1557483 (PMC11999961; doi:10.3389/fimmu.2025.1557483)
Supplement: Supplementary file 5 [file Table4.xlsx]

## Sheet: Annotation
MyList	Gene ID	Type	Tax ID	Homologene Gene ID	Homologene Gene Tax ID	Gene Symbol	Description	Protein Functions (ChatGPT)	Disease & Drugs (ChatGPT)	Biological Process (GO)	Kinase Class (UniProt)	Protein Function (Protein Atlas)	Subcellular Location (Protein Atlas)	Drug (DrugBank)	Canonical Pathways	Hallmark Gene Sets	WP364 IL6 signaling	R-HSA-1280215 Cytokine Signaling in Immune s	WP437 EGF EGFR signaling	GO:0070663 regulation of leukocyte prolif	GO:0071260 cellular response to mechanica	GO:0071549 cellular response to dexametha	M45 PID CD40 PATHWAY	GO:0043502 regulation of muscle adaptatio	GO:0010469 regulation of signaling recept	GO:0002768 immune response-regulating cel	GO:0031349 positive regulation of defense
ASAP1	50807	symbol	H. sapiens	50807	H. sapiens	ASAP1	ArfGAP with SH3 domain, ankyrin repeat and PH domain 1	ASAP1 is a gene that encodes an ADP-ribosylation factor (ARF) GTPase-activating protein. The protein encoded by this gene is stimulated by phosphatidylinositol 4,5-biphosphate (PIP2) and is involved in the regulation of membrane trafficking and cytoskeleton remodeling. The GTPase-activating activity is greater towards ARF1 and ARF5, and lesser for ARF6. There are different isoforms of this gene t…	Research has shown that ASAP1 may play a role in cancer progression and metastasis. Specifically, overexpression of ASAP1 has been observed in various types of cancer, including breast, lung, and pancreatic cancer. Targeting ASAP1 has been proposed as a potential therapeutic strategy for cancer treatment. However, there are currently no drugs on the market that specifically target ASAP1. Efforts …	GO:1903527 positive regulation of membrane tubulation;GO:1903525 regulation of membrane tubulation;GO:0061000 negative regulation of dendritic spine development		Predicted intracellular proteins	Centrosome (Uncertain); Additional: Cytosol;Plasma membrane		(M243)PID ARF 3PATHWAY; (M281)PID FAK PATHWAY		1.0	0.0	1.0	0.0	0.0	0.0	0.0	0.0	0.0	1.0	0.0
CAMK2G	818	symbol	H. sapiens	818	H. sapiens	CAMK2G	calcium/calmodulin dependent protein kinase II gamma	CAMK2G is a gene that encodes for the gamma subunit of an enzyme belonging to the serine/threonine protein kinase family and the Ca(2+)/calmodulin-dependent protein kinase subfamily. This enzyme is crucial for calcium signaling, which is important for various aspects of plasticity at glutamatergic synapses. In mammalian cells, the enzyme is composed of four different chains: alpha, beta, gamma, a…	CAMK2G has been implicated in various diseases, including cancer, cardiovascular disease, and neurological disorders such as Alzheimer's disease and schizophrenia. In cancer, CAMK2G has been shown to promote tumor growth and metastasis, making it a potential target for cancer therapy. In cardiovascular disease, CAMK2G has been linked to cardiac hypertrophy and heart failure, and inhibitors of CAM…	GO:0014733 regulation of skeletal muscle adaptation;GO:0030073 insulin secretion;GO:0030072 peptide hormone secretion	yes	Disease related genes; Potential drug targets; Transporters:Accessory Factors Involved in Transport; Kinases:CAMK Ser/Thr protein kinases; Human disease related genes:Other diseases:Mental and behavioural disorders; Predicted intracellular proteins; Enzymes; ENZYME proteins:Transferases	Plasma membrane (Uncertain); Additional: Cell Junctions;Cytosol	Bosutinib; 1-tert-butyl-3-(3-methylbenzyl)-1H-pyrazolo[3,4-d]pyrimidin-4-amine; Fostamatinib	(M266)PID NCADHERIN PATHWAY; (M161)PID IFNG PATHWAY; (M10)PID BCR 5PATHWAY		1.0	1.0	0.0	0.0	0.0	1.0	0.0	1.0	0.0	0.0	0.0
CBLB	868	symbol	H. sapiens	868	H. sapiens	CBLB	Cbl proto-oncogene B	CBLB, also known as Cbl proto-oncogene B, is a gene that encodes an E3 ubiquitin-protein ligase. This protein promotes protein degradation by transferring ubiquitin from an E2 ubiquitin-conjugating enzyme to a substrate. CBLB is involved in regulating the immune response by limiting the activation of T-cell receptor, B-cell receptor, and high affinity immunoglobulin epsilon receptor. Studies in m…	There is growing interest in targeting CBLB for the treatment of various diseases, including cancer, autoimmune disorders, and infectious diseases. In cancer, CBLB has been shown to play a role in regulating immune evasion by tumor cells, and its inhibition can enhance anti-tumor immune responses. Several small molecule inhibitors of CBLB have been developed and are currently being evaluated in p…	GO:0002249 lymphocyte anergy;GO:0002870 T cell anergy;GO:0002669 positive regulation of T cell anergy		Enzymes; ENZYME proteins:Transferases; Predicted intracellular proteins; Cancer-related genes	Cytosol (Supported); Additional: Nucleoplasm		(M45)PID CD40 PATHWAY; (M214)PID ERBB1 INTERNALIZATION PATHWAY; (M60)PID NFAT TFPATHWAY	(M5921)HALLMARK COMPLEMENT	1.0	1.0	1.0	1.0	1.0	0.0	1.0	0.0	1.0	1.0	0.0
CD226	10666	symbol	H. sapiens	10666	H. sapiens	CD226	CD226 molecule	CD226 is a gene that encodes a glycoprotein found on the surface of various immune cells, including natural killer cells, platelets, monocytes, and a subset of T cells. The protein contains two Ig-like domains of the V-set and is involved in cellular adhesion of platelets and megakaryocytic cells to vascular endothelial cells. It also plays a role in the maturation of megakaryocytic cells. Altern…	CD226 has been implicated in various diseases, including autoimmune disorders, infectious diseases, and cancer. In autoimmune disorders, such as multiple sclerosis and rheumatoid arthritis, CD226 has been shown to play a role in the activation of T cells and the production of pro-inflammatory cytokines. In infectious diseases, CD226 has been found to be involved in the recognition and elimination…	GO:0060369 positive regulation of Fc receptor mediated stimulatory signaling pathway;GO:0002860 positive regulation of natural killer cell mediated cytotoxicity directed against tumor cell target;GO:0002857 positive regulation of natural killer cell mediated immune response to tumor cell		Predicted intracellular proteins; Human disease related genes:Endocrine and metabolic diseases:Diabetes; CD markers	Plasma membrane (Supported); Additional: Centriolar satellite;Nucleoplasm				1.0	1.0	0.0	1.0	0.0	0.0	1.0	0.0	0.0	0.0	1.0
CD40	958	symbol	H. sapiens	958	H. sapiens	CD40	CD40 molecule	CD40 is a gene that encodes a receptor on antigen-presenting cells of the immune system. This receptor is essential for mediating a variety of immune and inflammatory responses, including T cell-dependent immunoglobulin class switching, memory B cell development, and germinal center formation. The gene is regulated by the AT-hook transcription factor AKNA, which coordinates the expression of the …	CD40 has been implicated in various diseases, including autoimmune disorders, cancer, and infectious diseases. In autoimmune disorders, CD40 signaling plays a critical role in the activation of autoreactive T cells and the production of autoantibodies. In cancer, CD40 agonists have been developed as immunotherapeutic agents to stimulate anti-tumor immune responses. In infectious diseases, CD40 si…	GO:0033590 response to cobalamin;GO:0036017 response to erythropoietin;GO:0036018 cellular response to erythropoietin		Cancer-related genes:Candidate cancer biomarkers; Disease related genes; Human disease related genes:Immune system diseases:Primary immunodeficiency; Predicted secreted proteins; CD markers		Lucatumumab; Dacetuzumab	(M45)PID CD40 PATHWAY; (M12705)SIG CD40PATHWAYMAP	(M5913)HALLMARK INTERFERON GAMMA RESPONSE; (M5932)HALLMARK INFLAMMATORY RESPONSE; (M5950)HALLMARK ALLOGRAFT REJECTION	1.0	1.0	0.0	1.0	1.0	0.0	1.0	0.0	0.0	1.0	0.0
CD86	942	symbol	H. sapiens	942	H. sapiens	CD86	CD86 molecule	CD86 is a gene that encodes a type I membrane protein belonging to the immunoglobulin superfamily. This protein is expressed by antigen-presenting cells and acts as a ligand for two proteins on the surface of T cells, CD28 antigen, and cytotoxic T-lymphocyte-associated protein 4. When CD86 binds with CD28 antigen, it provides a costimulatory signal for T-cell activation. However, when it binds wi…	CD86 has been implicated in various diseases, including autoimmune disorders, infectious diseases, and cancer. In autoimmune disorders such as rheumatoid arthritis and systemic lupus erythematosus, CD86 expression is upregulated, leading to increased T-cell activation and inflammation. In infectious diseases, CD86 is involved in the activation of T cells and the immune response against pathogens.…	GO:0032681 regulation of lymphotoxin A production;GO:0032761 positive regulation of lymphotoxin A production;GO:1990051 activation of protein kinase C activity		FDA approved drug targets:Biotech drugs; Predicted intracellular proteins; CD markers	Plasma membrane (Supported); Additional: Centriolar satellite	Antithymocyte immunoglobulin (rabbit); Abatacept; Belatacept; Bryostatin 1	(M290)PID IL12 STAT4 PATHWAY; (M88)PID CD8 TCR PATHWAY; (M34)PID TCR PATHWAY	(M5947)HALLMARK IL2 STAT5 SIGNALING; (M5913)HALLMARK INTERFERON GAMMA RESPONSE; (M5915)HALLMARK APICAL JUNCTION	1.0	1.0	0.0	1.0	0.0	0.0	1.0	0.0	0.0	0.0	0.0
COPB1	1315	symbol	H. sapiens	1315	H. sapiens	COPB1	COPI coat complex subunit beta 1	COPB1 is a gene that encodes a protein subunit of the coatomer complex, which is associated with non-clathrin coated vesicles. The coatomer complex, also known as the coat protein complex 1, is formed in the cytoplasm and is recruited to the Golgi by activated guanosine triphosphatases. Once at the Golgi membrane, the coatomer complex may assist in the movement of protein and lipid components bac…	Mutations in the COPB1 gene have been associated with a few rare genetic disorders, including a form of autosomal recessive intellectual disability known as SPG56. Additionally, some studies have suggested that alterations in the expression of COPB1 may be involved in the development and progression of certain types of cancer, such as breast cancer and hepatocellular carcinoma. There are currentl…	GO:0006891 intra-Golgi vesicle-mediated transport;GO:0006888 endoplasmic reticulum to Golgi vesicle-mediated transport;GO:0048193 Golgi vesicle transport		Disease related genes; Predicted intracellular proteins; Human disease related genes:Congenital malformations:Congenital malformations of the nervous system	Cytosol;Golgi apparatus;Vesicles (Enhanced)			(M5910)HALLMARK PROTEIN SECRETION	0.0	1.0	0.0	0.0	0.0	0.0	0.0	0.0	0.0	0.0	0.0
GRAP2	9402	symbol	H. sapiens	9402	H. sapiens	GRAP2	GRB2 related adaptor protein 2	GRAP2 is a gene that belongs to the GRB2/Sem5/Drk family and encodes an adaptor-like protein involved in signaling by leukocyte-specific protein-tyrosine kinase. The protein contains an SH2 domain flanked by two SH3 domains and interacts with other proteins such as GAB1 and LCP2 through its SH3 domains. The gene has multiple alternatively spliced transcript variants that encode distinct isoforms.	Research on GRAP2 has revealed its potential involvement in various diseases, including cancer, autoimmune disorders, and cardiovascular diseases. In cancer, GRAP2 has been shown to play a role in the regulation of cell proliferation, migration, and invasion, making it a potential target for cancer therapy. In autoimmune disorders, GRAP2 has been implicated in the regulation of T-cell activation …	GO:0007265 Ras protein signal transduction;GO:0007264 small GTPase-mediated signal transduction;GO:0043408 regulation of MAPK cascade		Predicted intracellular proteins	Cytosol;Nucleoplasm (Supported); Additional: Plasma membrane		(M190)PID TCR JNK PATHWAY; (M231)PID KIT PATHWAY; (M88)PID CD8 TCR PATHWAY		1.0	1.0	0.0	1.0	0.0	0.0	1.0	0.0	0.0	0.0	0.0
JAK1	3716	symbol	H. sapiens	3716	H. sapiens	JAK1	Janus kinase 1	JAK1 (Janus kinase 1) is a membrane protein that belongs to a class of protein-tyrosine kinases. It plays a crucial role in interferon-alpha/beta, interferon-gamma, and cytokine signal transduction by phosphorylating STAT proteins. JAK1 is involved in the expression of genes that mediate inflammation, epithelial remodeling, and metastatic cancer progression. It is a key component of the IL-6/JAK1…	JAK1 has been implicated in various diseases, including autoimmune disorders, inflammatory diseases, and cancer. Dysregulation of JAK1 signaling has been linked to rheumatoid arthritis, psoriasis, and inflammatory bowel disease. Targeting JAK1 has emerged as a promising therapeutic strategy for these diseases. Several JAK inhibitors have been developed and approved for clinical use, including tof…	GO:0038154 interleukin-11-mediated signaling pathway;GO:0035771 interleukin-4-mediated signaling pathway;GO:0038113 interleukin-9-mediated signaling pathway	yes	Disease related genes; Human disease related genes:Immune system diseases:Allergies and autoimmune diseases; FDA approved drug targets:Small molecule drugs; Predicted intracellular proteins; Kinases:Tyr protein kinases; Enzymes; ENZYME proteins:Transferases; Cancer-related genes		Myricetin; 2-tert-butyl-9-fluoro-1,6-dihydrobenzo[h]imidazo[4,5-f]isoquinolin-7-one; Ruxolitinib; Tofacitinib; Baricitinib; Fostamatinib; Fedratinib; Upadacitinib	(M206)PID PDGFRA PATHWAY; (M36)PID IL27 PATHWAY; (M1718)SIG IL4RECEPTOR IN B LYPHOCYTES	(M5907)HALLMARK ESTROGEN RESPONSE LATE	1.0	1.0	1.0	1.0	0.0	1.0	0.0	0.0	0.0	0.0	0.0
JAK2	3717	symbol	H. sapiens	3717	H. sapiens	JAK2	Janus kinase 2	JAK2 (Janus kinase 2) is a non-receptor tyrosine kinase that plays a crucial role in cytokine and growth factor signaling. It has an N-terminal FERM domain required for erythropoietin receptor association, an SH2 domain that binds STAT transcription factors, a pseudokinase domain, and a C-terminal tyrosine kinase domain. Cytokine binding induces autophosphorylation and activation of JAK2, which t…	Mutations in JAK2 have been implicated in several diseases, including myeloproliferative neoplasms (MPNs) such as polycythemia vera, essential thrombocythemia, and primary myelofibrosis. In these diseases, JAK2 mutations lead to constitutive activation of the JAK2/STAT signaling pathway, resulting in abnormal proliferation of blood cells. Targeted drug discovery efforts have focused on developing…	GO:0031959 nuclear receptor-mediated mineralocorticoid signaling pathway;GO:0034050 symbiont-induced defense-related programmed cell death;GO:0070757 interleukin-35-mediated signaling pathway	yes	Disease related genes; Cancer-related genes:Mutational cancer driver genes; Human disease related genes:Cardiovascular diseases:Vascular diseases; FDA approved drug targets:Small molecule drugs; Predicted intracellular proteins; Human disease related genes:Cardiovascular diseases:Hematologic diseases; Kinases:Tyr protein kinases; Enzymes; Human disease related genes:Cancers:Cancers of haematopoie…	Nucleoplasm (Supported); Additional: Focal adhesion sites;Plasma membrane	2-tert-butyl-9-fluoro-1,6-dihydrobenzo[h]imidazo[4,5-f]isoquinolin-7-one; XL019; 5-phenyl-1H-indazol-3-amine; 4-(3-amino-1H-indazol-5-yl)-N-tert-butylbenzenesulfonamide; 4-[(2-{4-[(CYCLOPROPYLCARBAMOYL)AMINO]-1H-PYRAZOL-3-YL}-1H-BENZIMIDAZOL-6-YL)METHYL]MORPHOLIN-4-IUM; Ruxolitinib; Tofacitinib; Baricitinib; Entrectinib; Fostamatinib; Fedratinib; Zanubrutinib	(M135)PID IL5 PATHWAY; (M36)PID IL27 PATHWAY; (M182)PID IL3 PATHWAY	(M5906)HALLMARK ESTROGEN RESPONSE EARLY; (M5907)HALLMARK ESTROGEN RESPONSE LATE; (M5913)HALLMARK INTERFERON GAMMA RESPONSE	1.0	1.0	1.0	1.0	1.0	1.0	0.0	0.0	1.0	0.0	0.0
KNKB1						None	None	None	None	None	None	None	None	None	None	None	nan	nan	nan	nan	nan	nan	nan	nan	nan	nan	nan
MAP3K14	9020	symbol	H. sapiens	9020	H. sapiens	MAP3K14	mitogen-activated protein kinase kinase kinase 14	MAP3K14 is a gene that encodes for a protein kinase called mitogen-activated protein kinase kinase kinase 14. This kinase binds to TRAF2 and stimulates NF-kappaB activity, which is involved in an NF-kappaB-inducing signalling cascade common to receptors of the tumour-necrosis/nerve-growth factor (TNF/NGF) family and to the interleukin-1 type-I receptor. MAP3K14 shares sequence similarity with sev…	MAP3K14 has been implicated in various diseases, including cancer, inflammation, and autoimmune disorders. In cancer, MAP3K14 has been shown to promote tumor growth and metastasis by activating NF-kappaB signaling. Therefore, targeting MAP3K14 has emerged as a potential therapeutic strategy for cancer treatment. Several small molecule inhibitors of MAP3K14 have been developed and are currently be…	GO:0038061 non-canonical NF-kappaB signal transduction;GO:0007249 canonical NF-kappaB signal transduction;GO:0071260 cellular response to mechanical stimulus	yes	Kinases:STE Ser/Thr protein kinases; Enzymes; ENZYME proteins:Transferases; Predicted intracellular proteins	Cytosol;Vesicles (Supported); Additional: Nucleoli fibrillar center;Nucleoplasm		(M45)PID CD40 PATHWAY; (M63)PID AVB3 OPN PATHWAY; (M197)PID HIV NEF PATHWAY		1.0	1.0	0.0	0.0	1.0	0.0	1.0	0.0	0.0	0.0	0.0
MAPK1	5594	symbol	H. sapiens	5594	H. sapiens	MAPK1	mitogen-activated protein kinase 1	MAPK1, also known as mitogen-activated protein kinase 1, is a member of the MAP kinase family. It acts as an integration point for multiple biochemical signals and is involved in various cellular processes such as proliferation, differentiation, transcription regulation, and development. The activation of MAPK1 requires its phosphorylation by upstream kinases. Once activated, it translocates to t…	MAPK1 has been implicated in various diseases, including cancer, cardiovascular diseases, and neurological disorders. In cancer, MAPK1 is often overexpressed or hyperactivated, leading to increased cell proliferation and survival. Targeting MAPK1 has been a focus of drug discovery efforts, with several inhibitors in clinical trials for cancer treatment. For example, trametinib and cobimetinib are…	GO:0019858 cytosine metabolic process;GO:0090170 regulation of Golgi inheritance;GO:0072584 caveolin-mediated endocytosis	yes	Cancer-related genes:Candidate cancer biomarkers; Disease related genes; Kinases:CMGC Ser/Thr protein kinases; FDA approved drug targets:Small molecule drugs; RAS pathway related proteins; Predicted intracellular proteins; Enzymes; ENZYME proteins:Transferases; Human disease related genes:Congenital malformations:Other congenital malformations	Cytosol (Supported); Additional: Nuclear speckles	Acetylsalicylic acid; Minocycline; Isoprenaline; Arsenic trioxide; Olomoucine; Phosphonothreonine; Purvalanol; SB220025; Seliciclib; Perifosine; N,N-DIMETHYL-4-(4-PHENYL-1H-PYRAZOL-3-YL)-1H-PYRROLE-2-CARBOXAMIDE; N-BENZYL-4-[4-(3-CHLOROPHENYL)-1H-PYRAZOL-3-YL]-1H-PYRROLE-2-CARBOXAMIDE; (S)-N-(1-(3-CHLORO-4-FLUOROPHENYL)-2-HYDROXYETHYL)-4-(4-(3-CHLOROPHENYL)-1H-PYRAZOL-3-YL)-1H-PYRROLE-2-CARBOXAMI…	(M64)PID S1P S1P4 PATHWAY; (M134)PID TCR RAS PATHWAY; (M120)PID ARF6 DOWNSTREAM PATHWAY	(M5910)HALLMARK PROTEIN SECRETION; (M5923)HALLMARK PI3K AKT MTOR SIGNALING	1.0	1.0	1.0	1.0	0.0	1.0	0.0	0.0	0.0	1.0	0.0
MAPK3	5595	symbol	H. sapiens	5595	H. sapiens	MAPK3	mitogen-activated protein kinase 3	MAPK3, also known as mitogen-activated protein kinase 3, is a member of the MAP kinase family. It plays a role in regulating various cellular processes such as proliferation, differentiation, and cell cycle progression in response to extracellular signals. This kinase is activated by upstream kinases, leading to its translocation to the nucleus where it phosphorylates nuclear targets. Different p…	MAPK3 has been implicated in various diseases, including cancer, cardiovascular disease, and neurological disorders. In cancer, MAPK3 is often overexpressed and hyperactivated, leading to increased cell proliferation and survival. Targeting MAPK3 has been explored as a potential therapeutic strategy for cancer treatment. Several drugs targeting MAPK3 have been developed, including selumetinib, tr…	GO:0090170 regulation of Golgi inheritance;GO:0072584 caveolin-mediated endocytosis;GO:0120041 positive regulation of macrophage proliferation	yes	Cancer-related genes:Candidate cancer biomarkers; Kinases:CMGC Ser/Thr protein kinases; FDA approved drug targets:Small molecule drugs; RAS pathway related proteins; Predicted intracellular proteins; Enzymes; ENZYME proteins:Transferases	Nucleoplasm (Supported)	Sulindac; Arsenic trioxide; Purvalanol; 5-iodotubercidin; Seliciclib; Cholecystokinin; Ulixertinib	(M64)PID S1P S1P4 PATHWAY; (M134)PID TCR RAS PATHWAY; (M120)PID ARF6 DOWNSTREAM PATHWAY		1.0	1.0	1.0	1.0	1.0	1.0	0.0	0.0	1.0	0.0	1.0
MEF2C	4208	symbol	H. sapiens	4208	H. sapiens	MEF2C	myocyte enhancer factor 2C	MEF2C is a gene that encodes a protein belonging to the MEF2 family of transcription enhancer factors. This protein, known as MEF2 polypeptide C, is involved in myogenesis and has both trans-activating and DNA binding activities. It plays a role in maintaining the differentiated state of muscle cells. Mutations and deletions in this gene have been linked to severe cognitive disability, stereotypi…	Mutations and deletions in the MEF2C gene have been linked to severe cognitive disability, stereotypic movements, epilepsy, and cerebral malformation. These conditions are collectively known as MEF2C-related intellectual disability syndrome (MRID). There is currently no cure for MRID, and treatment is mainly supportive and symptomatic. Targeted drug discovery efforts for MRID are still in the ear…	GO:0003185 sinoatrial valve morphogenesis;GO:0003172 sinoatrial valve development;GO:0007521 muscle cell fate determination		Disease related genes; Human disease related genes:Other diseases:Mental and behavioural disorders; Predicted intracellular proteins; Transcription factors:alpha-Helices exposed by beta-structures; Human disease related genes:Other congenital disorders:Chromosomal abnormalities	Nucleoplasm;Vesicles (Supported)		(M30)PID HDAC CLASSII PATHWAY; (M270)PID MAPK TRK PATHWAY; (M229)PID P38 ALPHA BETA DOWNSTREAM PATHWAY	(M5909)HALLMARK MYOGENESIS	1.0	1.0	1.0	1.0	1.0	1.0	0.0	0.0	0.0	1.0	1.0
MINK1	50488	symbol	H. sapiens	50488	H. sapiens	MINK1	misshapen like kinase 1	MINK1 is a gene that encodes a serine/threonine kinase belonging to the germinal center kinase family. It is structurally similar to kinases related to NIK and may belong to a distinct subfamily of NIK-related kinases within the GCK family. Studies of the mouse homolog suggest that MINK1 is up-regulated during postnatal cerebral development and activates the cJun N-terminal kinase and p38 pathway…	There is limited information available on the disease implications of MINK1. However, recent studies have suggested that MINK1 may play a role in the development and progression of certain types of cancer, including breast cancer and hepatocellular carcinoma. Targeted drug discovery efforts for MINK1 are still in the early stages, but there is potential for the development of small molecule inhib…	GO:2000311 regulation of AMPA receptor activity;GO:1900745 positive regulation of p38MAPK cascade;GO:0099601 regulation of neurotransmitter receptor activity	yes	Kinases:STE Ser/Thr protein kinases; Enzymes; ENZYME proteins:Transferases; Predicted intracellular proteins		Fostamatinib			1.0	0.0	0.0	1.0	0.0	0.0	0.0	0.0	1.0	1.0	0.0
NR3C1	2908	symbol	H. sapiens	2908	H. sapiens	NR3C1	nuclear receptor subfamily 3 group C member 1	NR3C1 is a gene that encodes the glucocorticoid receptor, which acts as a transcription factor by binding to glucocorticoid response elements in the promoters of glucocorticoid responsive genes to activate their transcription. It is also involved in regulating other transcription factors. The receptor is typically found in the cytoplasm but is transported into the nucleus upon ligand binding. NR3…	Mutations in NR3C1 have been associated with a rare genetic disorder called generalized glucocorticoid resistance, which is characterized by a reduced sensitivity to glucocorticoid hormones. This condition can lead to a variety of symptoms, including growth retardation, delayed puberty, and immune dysfunction. Targeted drug discovery efforts have focused on developing compounds that can modulate …	GO:0043402 glucocorticoid mediated signaling pathway;GO:0042921 nuclear receptor-mediated glucocorticoid signaling pathway;GO:0031958 nuclear receptor-mediated corticosteroid signaling pathway		Disease related genes; Transcription factors:Zinc-coordinating DNA-binding domains; Human disease related genes:Musculoskeletal diseases:Skeletal diseases; FDA approved drug targets:Small molecule drugs; Predicted intracellular proteins; Nuclear receptors; Human disease related genes:Endocrine and metabolic diseases:Adrenal gland diseases	Cytosol;Nucleoplasm (Supported); Additional: Mitochondria	Flunisolide; Diflorasone; Alclometasone; Medrysone; Amcinonide; Fluorometholone; Megestrol acetate; Levonorgestrel; Beclomethasone dipropionate; Progesterone; Spironolactone; Betamethasone; Desoximetasone; Fluticasone propionate; Fluocinolone acetonide; Ulobetasol; Triamcinolone; Prednisone; Flumethasone; Fludrocortisone; Norethisterone; Hydrocortisone; Mometasone; Hydrocortamate; Mifepristone; C…	(M30)PID HDAC CLASSII PATHWAY; (M106)PID HNF3B PATHWAY; (M151)PID AR TF PATHWAY	(M5942)HALLMARK UV RESPONSE DN; (M5891)HALLMARK HYPOXIA; (M5945)HALLMARK HEME METABOLISM	1.0	1.0	1.0	1.0	1.0	1.0	0.0	0.0	0.0	1.0	0.0
PHACTR2	9749	symbol	H. sapiens	9749	H. sapiens	PHACTR2	phosphatase and actin regulator 2	PHACTR2 is a human gene that is predicted to have actin binding activity and be involved in actin cytoskeleton organization. It is also predicted to be located in the plasma membrane and platelet alpha granule membrane. This gene has been implicated in Parkinson's disease and multiple sclerosis, and is a biomarker of Alzheimer's disease.	PHACTR2 has been implicated in several neurological disorders, including Parkinson's disease, multiple sclerosis, and Alzheimer's disease. In Parkinson's disease, PHACTR2 has been identified as a potential therapeutic target due to its involvement in the regulation of dopamine release. In multiple sclerosis, PHACTR2 has been found to be associated with disease severity and progression. Additional…	GO:0030036 actin cytoskeleton organization;GO:0030029 actin filament-based process;GO:0007010 cytoskeleton organization		Predicted intracellular proteins	Golgi apparatus (Approved); Additional: Plasma membrane				1.0	0.0	0.0	0.0	0.0	0.0	0.0	0.0	1.0	0.0	0.0
PHKG1	5260	symbol	H. sapiens	5260	H. sapiens	PHKG1	phosphorylase kinase catalytic subunit gamma 1	PHKG1 is a gene that encodes a protein with one protein kinase domain and two calmodulin-binding domains. It is a member of the Ser/Thr protein kinase family and is the catalytic subunit of a 16 subunit protein kinase complex that is a crucial glycogenolytic regulatory enzyme. The gene has two pseudogenes at chromosome 7q11.21 and one at chromosome 11p11.12. Multiple transcript variants encoding …	PHKG1 has been implicated in several diseases, including glycogen storage disease type IXa (GSD IXa), which is caused by mutations in the PHKA2 gene that encodes the regulatory subunit of the same protein kinase complex. GSD IXa is characterized by liver and muscle glycogen accumulation, leading to hepatomegaly, muscle weakness, and exercise intolerance. PHKG1 has also been linked to type 2 diabe…	GO:0005978 glycogen biosynthetic process;GO:0009250 glucan biosynthetic process;GO:0000271 polysaccharide biosynthetic process	yes	Enzymes; ENZYME proteins:Transferases; Predicted intracellular proteins; Kinases:CAMK Ser/Thr protein kinases		Fostamatinib		(M5891)HALLMARK HYPOXIA	1.0	0.0	0.0	0.0	0.0	0.0	0.0	0.0	0.0	0.0	0.0
RPS6KB1	6198	symbol	H. sapiens	6198	H. sapiens	RPS6KB1	ribosomal protein S6 kinase B1	RPS6KB1 is a gene that belongs to the ribosomal S6 kinase family of serine/threonine kinases. It is involved in responding to mTOR signaling, which promotes protein synthesis, cell growth, and cell proliferation. The activity of this gene has been linked to human cancer. The gene has alternatively spliced transcript variants, resulting in isoforms with longer or shorter N-termini that may differ …	RPS6KB1 has been implicated in various diseases, including cancer, diabetes, and neurological disorders. In cancer, RPS6KB1 is often overexpressed and hyperactivated, leading to increased cell proliferation and survival. Targeting RPS6KB1 has been explored as a potential therapeutic strategy for cancer, and several drugs have been developed to inhibit its activity. For example, the mTOR inhibitor…	GO:0014878 response to electrical stimulus involved in regulation of muscle adaptation;GO:0014732 skeletal muscle atrophy;GO:0048633 positive regulation of skeletal muscle tissue growth	yes	Kinases:AGC Ser/Thr protein kinases; Enzymes; ENZYME proteins:Transferases; Predicted intracellular proteins	Nucleoplasm (Supported)		(M162)PID RXR VDR PATHWAY; (M125)PID IGF1 PATHWAY; (M143)PID IL2 PI3K PATHWAY		1.0	1.0	1.0	1.0	1.0	1.0	0.0	1.0	0.0	0.0	0.0
STAT3	6774	symbol	H. sapiens	6774	H. sapiens	STAT3	signal transducer and activator of transcription 3	STAT3 is a gene that encodes a protein belonging to the STAT family. This protein is activated by phosphorylation in response to various cytokines and growth factors, and forms homo- or heterodimers that translocate to the cell nucleus where they act as transcription activators. STAT3 plays a key role in many cellular processes such as cell growth and apoptosis, and mediates the expression of a v…	STAT3 has been implicated in a variety of diseases, including cancer, autoimmune disorders, and inflammatory diseases. In cancer, STAT3 is often constitutively activated, leading to increased cell proliferation, survival, and invasion. As a result, targeting STAT3 has been a focus of drug discovery efforts. Several small molecule inhibitors of STAT3 have been developed, including napabucasin, whi…	GO:2000635 negative regulation of primary miRNA processing;GO:1904685 positive regulation of metalloendopeptidase activity;GO:0038154 interleukin-11-mediated signaling pathway		Disease related genes; Human disease related genes:Immune system diseases:Primary immunodeficiency; Transcription factors:Immunoglobulin fold; Cancer-related genes:Mutational cancer driver genes; Predicted intracellular proteins; Human disease related genes:Immune system diseases:Allergies and autoimmune diseases; Human disease related genes:Cancers:Head and neck cancers	Cytosol;Nucleoplasm (Supported)	ENMD-1198	(M36)PID IL27 PATHWAY; (M290)PID IL12 STAT4 PATHWAY; (M127)PID ERBB1 RECEPTOR PROXIMAL PATHWAY	(M5897)HALLMARK IL6 JAK STAT3 SIGNALING; (M5913)HALLMARK INTERFERON GAMMA RESPONSE	1.0	1.0	1.0	1.0	1.0	1.0	0.0	1.0	0.0	1.0	0.0
TNFRSF1A	7132	symbol	H. sapiens	7132	H. sapiens	TNFRSF1A	TNF receptor superfamily member 1A	TNFRSF1A is a gene that encodes a protein belonging to the TNF receptor superfamily. The protein exists in both membrane-bound and soluble forms and interacts with its ligand, tumor necrosis factor alpha, in the same forms. The binding of membrane-bound tumor necrosis factor alpha to the membrane-bound receptor leads to receptor trimerization and activation, which plays a role in cell survival, a…	TNFRSF1A mutations are associated with a rare autosomal dominant disorder called tumor necrosis factor receptor-associated periodic syndrome (TRAPS). This disorder is characterized by recurrent episodes of fever, abdominal pain, joint pain, and skin rashes. There are currently no FDA-approved drugs specifically targeting TNFRSF1A for TRAPS treatment. However, anti-TNF drugs such as etanercept and…	GO:0003332 negative regulation of extracellular matrix constituent secretion;GO:1902339 positive regulation of apoptotic process involved in morphogenesis;GO:1904747 positive regulation of apoptotic process involved in development		Cancer-related genes:Candidate cancer biomarkers; Disease related genes; Predicted secreted proteins; Human disease related genes:Immune system diseases:Other immune system diseases; CD markers; FDA approved drug targets:Biotech drugs; Human disease related genes:Immune system diseases:Allergies and autoimmune diseases; Candidate cardiovascular disease genes		6-[3-(4-Morpholinyl)Propyl]-2-(3-Nitrophenyl)-5-Thioxo-5,6,-Dihydro-7h-Thienol[2',3':4,5]Pyrrolo[1,2-C]Imidazol-7-One; Tasonermin	(M11736)SA MMP CYTOKINE CONNECTION; (M37)PID NFKAPPAB CANONICAL PATHWAY; (M197)PID HIV NEF PATHWAY	(M5897)HALLMARK IL6 JAK STAT3 SIGNALING; (M5923)HALLMARK PI3K AKT MTOR SIGNALING; (M5934)HALLMARK XENOBIOTIC METABOLISM	1.0	1.0	0.0	1.0	1.0	0.0	0.0	1.0	0.0	0.0	1.0
TNXB	7148	symbol	H. sapiens	7148	H. sapiens	TNXB	tenascin XB	TNXB is a gene that encodes a glycoprotein belonging to the tenascin family of extracellular matrix proteins. Unlike fibronectin, tenascins have anti-adhesive effects. TNXB is involved in matrix maturation during wound healing, and its deficiency is associated with Ehlers-Danlos syndrome, a connective tissue disorder. TNXB is located in the major histocompatibility complex (MHC) class III region …	TNXB deficiency is associated with Ehlers-Danlos syndrome (EDS), a group of inherited connective tissue disorders characterized by joint hypermobility, skin hyperextensibility, and tissue fragility. EDS can be caused by mutations in various genes involved in collagen synthesis, processing, and assembly, as well as in other extracellular matrix proteins. There is currently no cure for EDS, and tre…	GO:1905935 positive regulation of cell fate determination;GO:1905933 regulation of cell fate determination;GO:1904028 positive regulation of collagen fibril organization		Disease related genes; Predicted secreted proteins; Human disease related genes:Congenital malformations:Congenital malformations of skin; Predicted intracellular proteins; Human disease related genes:Urinary system diseases:Kidney diseases	Vesicles (Supported)		(M3008)NABA ECM GLYCOPROTEINS; (M5884)NABA CORE MATRISOME; (M5889)NABA MATRISOME		1.0	0.0	1.0	0.0	0.0	0.0	0.0	0.0	1.0	0.0	0.0
TYK2	7297	symbol	H. sapiens	7297	H. sapiens	TYK2	tyrosine kinase 2	TYK2 is a gene that encodes a protein belonging to the Janus kinases (JAKs) family. This protein is involved in cytokine signaling by phosphorylating receptor subunits and is a component of both type I and type III interferon signaling pathways. It plays a role in anti-viral immunity and is associated with Immunodeficiency 35 when mutated. TYK2 associates with the cytoplasmic domain of type I and…	Mutations in the TYK2 gene have been associated with various autoimmune diseases, including rheumatoid arthritis, psoriasis, and inflammatory bowel disease. As a result, TYK2 has become a target for drug discovery efforts aimed at treating these diseases. Several small molecule inhibitors of TYK2 have been developed and are currently in clinical trials, including BMS-986165, PF-06700841, and TAK-…	GO:0051142 positive regulation of NK T cell proliferation;GO:0051140 regulation of NK T cell proliferation;GO:0035722 interleukin-12-mediated signaling pathway	yes	Disease related genes; Human disease related genes:Immune system diseases:Primary immunodeficiency; FDA approved drug targets:Small molecule drugs; Predicted intracellular proteins; Kinases:Tyr protein kinases; Enzymes; ENZYME proteins:Transferases	Cytosol (Approved)	2-tert-butyl-9-fluoro-1,6-dihydrobenzo[h]imidazo[4,5-f]isoquinolin-7-one; Tofacitinib; Fostamatinib	(M36)PID IL27 PATHWAY; (M196)PID IL23 PATHWAY; (M183)PID IL6 7 PATHWAY	(M5897)HALLMARK IL6 JAK STAT3 SIGNALING	1.0	1.0	0.0	1.0	0.0	0.0	0.0	0.0	0.0	0.0	0.0
YWHAG	7532	symbol	H. sapiens	7532	H. sapiens	YWHAG	tyrosine 3-monooxygenase/tryptophan 5-monooxygenase activation protein gamma	YWHAG is a gene that encodes a protein belonging to the 14-3-3 family, which plays a crucial role in signal transduction by binding to phosphoserine-containing proteins. This protein is highly conserved in both plants and mammals and is identical to the rat ortholog. It is induced by growth factors in human vascular smooth muscle cells and is highly expressed in skeletal and heart muscles, indica…	YWHAG has been implicated in several diseases, including cancer, neurodegenerative disorders, and psychiatric disorders. In cancer, YWHAG has been shown to interact with oncogenic proteins such as AKT and BCR-ABL, promoting cell survival and proliferation. Targeting YWHAG has been explored as a potential therapeutic strategy for cancer treatment. In neurodegenerative disorders, YWHAG has been fou…	GO:0042149 cellular response to glucose starvation;GO:1904262 negative regulation of TORC1 signaling;GO:0032007 negative regulation of TOR signaling		Disease related genes; Human disease related genes:Nervous system diseases:Epilepsy; Predicted intracellular proteins	Cytosol (Approved)		(M199)PID P38 MK2 PATHWAY; (M182)PID IL3 PATHWAY; (M247)PID INSULIN GLUCOSE PATHWAY	(M5905)HALLMARK ADIPOGENESIS	1.0	1.0	0.0	1.0	0.0	0.0	0.0	0.0	0.0	1.0	0.0

## Sheet: Enrichment
GroupID	Category	Term	Description	LogP	Log(q-value)	Genes	Symbols	InTerm_InList
1_Summary	WikiPathways	WP364	IL6 signaling	-14.6314	-10.5182	3716,3717,5594,5595,6198,6774,7297,9020,7532,818,958,7132,942,2908,4208,9402,868,50488,7148,5260,50807,10666,9749	JAK1,JAK2,MAPK1,MAPK3,RPS6KB1,STAT3,TYK2,MAP3K14,YWHAG,CAMK2G,CD40,TNFRSF1A,CD86,NR3C1,MEF2C,GRAP2,CBLB,MINK1,TNXB,PHKG1,ASAP1,CD226,PHACTR2	23/-
1_Member	WikiPathways	WP364	IL6 signaling	-14.6314	-10.5182	3716,3717,5594,5595,6198,6774,7297	JAK1,JAK2,MAPK1,MAPK3,RPS6KB1,STAT3,TYK2	7/43
1_Member	WikiPathways	WP2332	IL11 signaling	-14.5563	-10.5182	3716,3717,5594,5595,6198,6774,7297	JAK1,JAK2,MAPK1,MAPK3,RPS6KB1,STAT3,TYK2	7/44
1_Member	WikiPathways	WP395	IL4 signaling	-14.1415	-10.4002	3716,3717,5594,5595,6198,6774,7297	JAK1,JAK2,MAPK1,MAPK3,RPS6KB1,STAT3,TYK2	7/50
1_Member	WikiPathways	WP2112	IL17 signaling	-12.9538	-9.39273	3716,3717,5594,5595,6774,9020	JAK1,JAK2,MAPK1,MAPK3,STAT3,MAP3K14	6/32
1_Member	WikiPathways	WP2037	Prolactin signaling	-12.891	-9.39273	3716,3717,5594,5595,6198,6774,7532	JAK1,JAK2,MAPK1,MAPK3,RPS6KB1,STAT3,YWHAG	7/74
1_Member	WikiPathways	WP4341	Non genomic actions of 1 25 dihydroxyvitamin D3	-12.8069	-9.36663	818,958,3716,5594,5595,7132,7297	CAMK2G,CD40,JAK1,MAPK1,MAPK3,TNFRSF1A,TYK2	7/76
1_Member	WikiPathways	WP127	IL5 signaling	-12.5457	-9.15662	3716,3717,5594,5595,6198,6774	JAK1,JAK2,MAPK1,MAPK3,RPS6KB1,STAT3	6/37
1_Member	Canonical Pathways	M161	PID IFNG PATHWAY	-12.3286	-9.02667	818,3716,3717,5594,5595,6774	CAMK2G,JAK1,JAK2,MAPK1,MAPK3,STAT3	6/40
1_Member	WikiPathways	WP5347	IL26 signaling	-11.8256	-8.59308	3716,3717,5594,5595,6774,7297	JAK1,JAK2,MAPK1,MAPK3,STAT3,TYK2	6/48
1_Member	WikiPathways	WP2868	TCA cycle nutrient use and invasiveness of ovarian cancer	-11.8225	-8.59308	3716,5594,5595,6774	JAK1,MAPK1,MAPK3,STAT3	4/5
1_Member	WikiPathways	WP286	IL3 signaling	-11.7691	-8.58474	942,3716,3717,5594,5595,6774	CD86,JAK1,JAK2,MAPK1,MAPK3,STAT3	6/49
1_Member	GO Biological Processes	GO:0032870	cellular response to hormone stimulus	-11.5477	-8.40845	2908,3716,3717,4208,5594,5595,6198,6774,7297,7532	NR3C1,JAK1,JAK2,MEF2C,MAPK1,MAPK3,RPS6KB1,STAT3,TYK2,YWHAG	10/514
1_Member	WikiPathways	WP2374	Oncostatin M signaling	-11.4048	-8.29195	3716,3717,5594,5595,6774,7297	JAK1,JAK2,MAPK1,MAPK3,STAT3,TYK2	6/56
1_Member	WikiPathways	WP2032	Thyroid stimulating hormone TSH signaling	-11.3096	-8.22148	3716,3717,5594,5595,6198,6774	JAK1,JAK2,MAPK1,MAPK3,RPS6KB1,STAT3	6/58
1_Member	Reactome Gene Sets	R-HSA-112409	RAF-independent MAPK1/3 activation	-11.1792	-8.11462	3716,3717,5594,5595,7297	JAK1,JAK2,MAPK1,MAPK3,TYK2	5/23
1_Member	GO Biological Processes	GO:0071375	cellular response to peptide hormone stimulus	-10.9318	-7.88944	3716,3717,5594,5595,6198,6774,7297,7532	JAK1,JAK2,MAPK1,MAPK3,RPS6KB1,STAT3,TYK2,YWHAG	8/248
1_Member	WikiPathways	WP2034	Leptin signaling	-10.7636	-7.7425	3716,3717,5594,5595,6198,6774	JAK1,JAK2,MAPK1,MAPK3,RPS6KB1,STAT3	6/71
1_Member	WikiPathways	WP5422	IL19 signaling	-10.7149	-7.71393	3716,5594,5595,6774,7132	JAK1,MAPK1,MAPK3,STAT3,TNFRSF1A	5/28
1_Member	Reactome Gene Sets	R-HSA-9732724	IFNG signaling activates MAPKs	-10.677	-7.69542	3716,3717,5594,5595	JAK1,JAK2,MAPK1,MAPK3	4/8
1_Member	KEGG Pathway	hsa05160	Hepatitis C	-10.5151	-7.58312	3716,5594,5595,6774,7132,7297,7532	JAK1,MAPK1,MAPK3,STAT3,TNFRSF1A,TYK2,YWHAG	7/159
1_Member	WikiPathways	WP4538	Regulatory circuits of STAT3 signaling	-10.5115	-7.58312	3716,3717,5594,5595,6774,7297	JAK1,JAK2,MAPK1,MAPK3,STAT3,TYK2	6/78
1_Member	KEGG Pathway	hsa01521	EGFR tyrosine kinase inhibitor resistance	-10.4438	-7.53179	3716,3717,5594,5595,6198,6774	JAK1,JAK2,MAPK1,MAPK3,RPS6KB1,STAT3	6/80
1_Member	WikiPathways	WP4806	EGFR tyrosine kinase inhibitor resistance	-10.3135	-7.44724	3716,3717,5594,5595,6198,6774	JAK1,JAK2,MAPK1,MAPK3,RPS6KB1,STAT3	6/84
1_Member	Reactome Gene Sets	R-HSA-110056	MAPK3 (ERK1) activation	-10.2004	-7.37757	3716,3717,5595,7297	JAK1,JAK2,MAPK3,TYK2	4/10
1_Member	WikiPathways	WP5098	T cell activation SARS CoV 2	-10.1894	-7.37757	942,3717,5594,5595,7297,9402	CD86,JAK2,MAPK1,MAPK3,TYK2,GRAP2	6/88
1_Member	KEGG Pathway	hsa05235	PD-L1 expression and PD-1 checkpoint pathway in cancer	-10.1296	-7.33033	3716,3717,5594,5595,6198,6774	JAK1,JAK2,MAPK1,MAPK3,RPS6KB1,STAT3	6/90
1_Member	WikiPathways	WP2203	Thymic stromal lymphopoietin TSLP signaling	-10.07	-7.29484	3716,3717,5594,5595,6774	JAK1,JAK2,MAPK1,MAPK3,STAT3	5/37
1_Member	WikiPathways	WP49	IL2 signaling	-10.07	-7.29484	3716,5594,5595,6198,6774	JAK1,MAPK1,MAPK3,RPS6KB1,STAT3	5/37
1_Member	GO Biological Processes	GO:0071417	cellular response to organonitrogen compound	-10.0036	-7.26235	3716,3717,4208,5594,5595,6198,6774,7297,7532	JAK1,JAK2,MEF2C,MAPK1,MAPK3,RPS6KB1,STAT3,TYK2,YWHAG	9/507
1_Member	GO Biological Processes	GO:0009725	response to hormone	-9.69218	-6.97208	2908,3716,3717,4208,5594,5595,6198,6774,7297,7532	NR3C1,JAK1,JAK2,MEF2C,MAPK1,MAPK3,RPS6KB1,STAT3,TYK2,YWHAG	10/795
1_Member	KEGG Pathway	hsa04659	Th17 cell differentiation	-9.64598	-6.93609	3716,3717,5594,5595,6774,7297	JAK1,JAK2,MAPK1,MAPK3,STAT3,TYK2	6/108
1_Member	KEGG Pathway	hsa04620	Toll-like receptor signaling pathway	-9.62161	-6.92171	942,958,3716,5594,5595,7297	CD86,CD40,JAK1,MAPK1,MAPK3,TYK2	6/109
1_Member	KEGG Pathway	hsa05417	Lipid and atherosclerosis	-9.5804	-6.89027	818,958,3717,5594,5595,6774,7132	CAMK2G,CD40,JAK2,MAPK1,MAPK3,STAT3,TNFRSF1A	7/216
1_Member	WikiPathways	WP4659	Gastrin signaling	-9.48008	-6.81298	3717,4208,5594,5595,6198,6774	JAK2,MEF2C,MAPK1,MAPK3,RPS6KB1,STAT3	6/115
1_Member	GO Biological Processes	GO:1901699	cellular response to nitrogen compound	-9.47509	-6.81298	3716,3717,4208,5594,5595,6198,6774,7297,7532	JAK1,JAK2,MEF2C,MAPK1,MAPK3,RPS6KB1,STAT3,TYK2,YWHAG	9/582
1_Member	GO Biological Processes	GO:0043434	response to peptide hormone	-9.45887	-6.80572	3716,3717,5594,5595,6198,6774,7297,7532	JAK1,JAK2,MAPK1,MAPK3,RPS6KB1,STAT3,TYK2,YWHAG	8/380
1_Member	WikiPathways	WP304	Kit receptor signaling	-9.25516	-6.61938	3717,5594,5595,6198,6774	JAK2,MAPK1,MAPK3,RPS6KB1,STAT3	5/53
1_Member	WikiPathways	WP22	IL9 signaling	-9.14763	-6.52028	3716,5594,5595,6774	JAK1,MAPK1,MAPK3,STAT3	4/17
1_Member	WikiPathways	WP3915	Angiopoietin like protein 8 regulatory pathway	-9.11707	-6.498	868,5594,5595,6198,9020,50488	CBLB,MAPK1,MAPK3,RPS6KB1,MAP3K14,MINK1	6/132
1_Member	WikiPathways	WP2380	Brain derived neurotrophic factor BDNF signaling	-9.01945	-6.40849	3717,4208,5594,5595,6198,6774	JAK2,MEF2C,MAPK1,MAPK3,RPS6KB1,STAT3	6/137
1_Member	WikiPathways	WP5083	Neuroinflammation and glutamatergic signaling	-8.96262	-6.35963	818,3716,5594,5595,6774,7132	CAMK2G,JAK1,MAPK1,MAPK3,STAT3,TNFRSF1A	6/140
1_Member	KEGG Pathway	hsa04380	Osteoclast differentiation	-8.92543	-6.33027	3716,5594,5595,7132,7297,9020	JAK1,MAPK1,MAPK3,TNFRSF1A,TYK2,MAP3K14	6/142
1_Member	Reactome Gene Sets	R-HSA-913531	Interferon Signaling	-8.91619	-6.32872	818,3716,3717,5594,5595,6774,7297	CAMK2G,JAK1,JAK2,MAPK1,MAPK3,STAT3,TYK2	7/269
1_Member	WikiPathways	WP205	IL7 signaling	-8.8396	-6.2671	3716,5594,5595,6774	JAK1,MAPK1,MAPK3,STAT3	4/20
1_Member	WikiPathways	WP4666	Hepatitis B infection	-8.76449	-6.19929	3716,3717,5594,5595,6774,7297	JAK1,JAK2,MAPK1,MAPK3,STAT3,TYK2	6/151
1_Member	WikiPathways	WP5130	Th17 cell differentiation pathway	-8.63396	-6.0855	3716,3717,5594,6774,7297	JAK1,JAK2,MAPK1,STAT3,TYK2	5/70
1_Member	WikiPathways	WP481	Insulin signaling	-8.61314	-6.07597	868,5594,5595,6198,9020,50488	CBLB,MAPK1,MAPK3,RPS6KB1,MAP3K14,MINK1	6/160
1_Member	KEGG Pathway	hsa05161	Hepatitis B	-8.56463	-6.04082	3716,3717,5594,5595,6774,7297	JAK1,JAK2,MAPK1,MAPK3,STAT3,TYK2	6/163
1_Member	Reactome Gene Sets	R-HSA-982772	Growth hormone receptor signaling	-8.49944	-5.9886	3717,5594,5595,6774	JAK2,MAPK1,MAPK3,STAT3	4/24
1_Member	WikiPathways	WP69	T cell receptor signaling	-8.48096	-5.97646	868,5594,5595,9020,9402	CBLB,MAPK1,MAPK3,MAP3K14,GRAP2	5/75
1_Member	KEGG Pathway	hsa05164	Influenza A	-8.42444	-5.94268	3716,3717,5594,5595,7132,7297	JAK1,JAK2,MAPK1,MAPK3,TNFRSF1A,TYK2	6/172
1_Member	KEGG Pathway	hsa05212	Pancreatic cancer	-8.4227	-5.94268	3716,5594,5595,6198,6774	JAK1,MAPK1,MAPK3,RPS6KB1,STAT3	5/77
1_Member	WikiPathways	WP581	EPO receptor signaling	-8.35162	-5.88334	3717,5594,5595,6774	JAK2,MAPK1,MAPK3,STAT3	4/26
1_Member	KEGG Pathway	hsa05152	Tuberculosis	-8.30603	-5.84349	818,3716,3717,5594,5595,7132	CAMK2G,JAK1,JAK2,MAPK1,MAPK3,TNFRSF1A	6/180
1_Member	GO Biological Processes	GO:0034612	response to tumor necrosis factor	-8.27727	-5.8342	958,3717,5594,5595,6198,7132	CD40,JAK2,MAPK1,MAPK3,RPS6KB1,TNFRSF1A	6/182
1_Member	KEGG Pathway	hsa05165	Human papillomavirus infection	-8.27446	-5.8342	3716,5594,5595,6198,7132,7148,7297	JAK1,MAPK1,MAPK3,RPS6KB1,TNFRSF1A,TNXB,TYK2	7/333
1_Member	GO Biological Processes	GO:0016310	phosphorylation	-8.21775	-5.78289	3716,3717,5594,5595,6198,6774,7297,50488	JAK1,JAK2,MAPK1,MAPK3,RPS6KB1,STAT3,TYK2,MINK1	8/547
1_Member	KEGG Pathway	hsa04012	ErbB signaling pathway	-8.17858	-5.74904	818,868,5594,5595,6198	CAMK2G,CBLB,MAPK1,MAPK3,RPS6KB1	5/86
1_Member	WikiPathways	WP4263	Pancreatic adenocarcinoma pathway	-8.10304	-5.68397	3716,5594,5595,6198,6774	JAK1,MAPK1,MAPK3,RPS6KB1,STAT3	5/89
1_Member	WikiPathways	WP673	ErbB signaling	-8.07844	-5.67461	818,868,5594,5595,6198	CAMK2G,CBLB,MAPK1,MAPK3,RPS6KB1	5/90
1_Member	KEGG Pathway	hsa04658	Th1 and Th2 cell differentiation	-8.03009	-5.63122	3716,3717,5594,5595,7297	JAK1,JAK2,MAPK1,MAPK3,TYK2	5/92
1_Member	KEGG Pathway	hsa04151	PI3K-Akt signaling pathway	-8.02461	-5.63065	3716,3717,5594,5595,6198,7148,7532	JAK1,JAK2,MAPK1,MAPK3,RPS6KB1,TNXB,YWHAG	7/362
1_Member	WikiPathways	WP3995	Prion disease pathway	-7.97182	-5.58271	4208,5594,5595,6774	MEF2C,MAPK1,MAPK3,STAT3	4/32
1_Member	Reactome Gene Sets	R-HSA-877300	Interferon gamma signaling	-7.93654	-5.55224	818,3716,3717,5594,5595	CAMK2G,JAK1,JAK2,MAPK1,MAPK3	5/96
1_Member	WikiPathways	WP4875	Disruption of postsynaptic signaling by CNV	-7.91593	-5.54571	818,5594,5595,7532	CAMK2G,MAPK1,MAPK3,YWHAG	4/33
1_Member	Canonical Pathways	M22	PID GMCSF PATHWAY	-7.7584	-5.39733	3717,5594,5595,6774	JAK2,MAPK1,MAPK3,STAT3	4/36
1_Member	KEGG Pathway	hsa05166	Human T-cell leukemia virus 1 infection	-7.75026	-5.39368	958,3716,5594,5595,7132,9020	CD40,JAK1,MAPK1,MAPK3,TNFRSF1A,MAP3K14	6/223
1_Member	Canonical Pathways	M164	PID ERBB1 DOWNSTREAM PATHWAY	-7.74	-5.38788	4208,5594,5595,6774,7532	MEF2C,MAPK1,MAPK3,STAT3,YWHAG	5/105
1_Member	KEGG Pathway	hsa05163	Human cytomegalovirus infection	-7.71571	-5.37236	3716,5594,5595,6198,6774,7132	JAK1,MAPK1,MAPK3,RPS6KB1,STAT3,TNFRSF1A	6/226
1_Member	WikiPathways	WP722	Serotonin HTR1 group and FOS pathway	-7.70895	-5.36992	3717,5594,5595,6774	JAK2,MAPK1,MAPK3,STAT3	4/37
1_Member	KEGG Pathway	hsa04066	HIF-1 signaling pathway	-7.65816	-5.32341	818,5594,5595,6198,6774	CAMK2G,MAPK1,MAPK3,RPS6KB1,STAT3	5/109
1_Member	KEGG Pathway	hsa05171	Coronavirus disease - COVID-19	-7.58208	-5.25157	3716,5594,5595,6774,7132,7297	JAK1,MAPK1,MAPK3,STAT3,TNFRSF1A,TYK2	6/238
1_Member	WikiPathways	WP2526	PDGF pathway	-7.56857	-5.24226	3716,5594,5595,6774	JAK1,MAPK1,MAPK3,STAT3	4/40
1_Member	Reactome Gene Sets	R-HSA-9656223	Signaling by RAF1 mutants	-7.43881	-5.13663	818,3717,5594,5595	CAMK2G,JAK2,MAPK1,MAPK3	4/43
1_Member	KEGG Pathway	hsa04660	T cell receptor signaling pathway	-7.41209	-5.11406	868,5594,5595,9020,9402	CBLB,MAPK1,MAPK3,MAP3K14,GRAP2	5/122
1_Member	Canonical Pathways	M175	PID ERBB2 ERBB3 PATHWAY	-7.39765	-5.10352	3717,5594,5595,6774	JAK2,MAPK1,MAPK3,STAT3	4/44
1_Member	Canonical Pathways	M186	PID PDGFRB PATHWAY	-7.29055	-5.0156	3717,5594,5595,6774,7532	JAK2,MAPK1,MAPK3,STAT3,YWHAG	5/129
1_Member	Reactome Gene Sets	R-HSA-5663202	Diseases of signal transduction by growth factor receptors and second messengers	-7.28626	-5.0156	818,942,3717,5594,5595,6774,7297	CAMK2G,CD86,JAK2,MAPK1,MAPK3,STAT3,TYK2	7/464
1_Member	Reactome Gene Sets	R-HSA-6802946	Signaling by moderate kinase activity BRAF mutants	-7.27977	-5.0156	818,3717,5594,5595	CAMK2G,JAK2,MAPK1,MAPK3	4/47
1_Member	Reactome Gene Sets	R-HSA-6802949	Signaling by RAS mutants	-7.27977	-5.0156	818,3717,5594,5595	CAMK2G,JAK2,MAPK1,MAPK3	4/47
1_Member	Reactome Gene Sets	R-HSA-6802955	Paradoxical activation of RAF signaling by kinase inactive BRAF	-7.27977	-5.0156	818,3717,5594,5595	CAMK2G,JAK2,MAPK1,MAPK3	4/47
1_Member	Reactome Gene Sets	R-HSA-9649948	Signaling downstream of RAS mutants	-7.27977	-5.0156	818,3717,5594,5595	CAMK2G,JAK2,MAPK1,MAPK3	4/47
1_Member	WikiPathways	WP5373	Osteoarthritic chondrocyte hypertrophy	-7.16947	-4.90891	3717,5594,5595,6774	JAK2,MAPK1,MAPK3,STAT3	4/50
1_Member	KEGG Pathway	hsa04910	Insulin signaling pathway	-7.1439	-4.88691	868,5260,5594,5595,6198	CBLB,PHKG1,MAPK1,MAPK3,RPS6KB1	5/138
1_Member	Canonical Pathways	M7955	SIG INSULIN RECEPTOR PATHWAY IN CARDIAC MYOCYTES	-7.13423	-4.88465	5594,5595,6198,7532	MAPK1,MAPK3,RPS6KB1,YWHAG	4/51
1_Member	GO Biological Processes	GO:0006468	protein phosphorylation	-7.13109	-4.88465	3716,3717,5594,5595,6198,7297,50488	JAK1,JAK2,MAPK1,MAPK3,RPS6KB1,TYK2,MINK1	7/489
1_Member	Reactome Gene Sets	R-HSA-5684996	MAPK1/MAPK3 signaling	-7.10935	-4.86637	818,3716,3717,5594,5595,7297	CAMK2G,JAK1,JAK2,MAPK1,MAPK3,TYK2	6/286
1_Member	KEGG Pathway	hsa04550	Signaling pathways regulating pluripotency of stem cells	-7.0515	-4.81537	3716,3717,5594,5595,6774	JAK1,JAK2,MAPK1,MAPK3,STAT3	5/144
1_Member	WikiPathways	WP5434	Cancer pathways	-7.0128	-4.79028	818,3716,3717,5594,5595,6198,6774	CAMK2G,JAK1,JAK2,MAPK1,MAPK3,RPS6KB1,STAT3	7/509
1_Member	Canonical Pathways	M122	PID IL2 1PATHWAY	-7.00009	-4.79028	3716,5594,5595,6774	JAK1,MAPK1,MAPK3,STAT3	4/55
1_Member	Reactome Gene Sets	R-HSA-109606	Intrinsic Pathway for Apoptosis	-7.00009	-4.79028	5594,5595,6774,7532	MAPK1,MAPK3,STAT3,YWHAG	4/55
1_Member	WikiPathways	WP2795	Cardiac hypertrophic response	-7.00009	-4.79028	5594,5595,7132,9020	MAPK1,MAPK3,TNFRSF1A,MAP3K14	4/55
1_Member	WikiPathways	WP4754	IL18 signaling	-6.96813	-4.7615	5594,5595,6198,7132	MAPK1,MAPK3,RPS6KB1,TNFRSF1A	4/56
1_Member	WikiPathways	WP3932	Focal adhesion PI3K Akt mTOR signaling	-6.96137	-4.7579	3716,3717,5594,5595,6198,7148	JAK1,JAK2,MAPK1,MAPK3,RPS6KB1,TNXB	6/303
1_Member	WikiPathways	WP1434	Osteopontin signaling	-6.9074	-4.71327	5594,5595,9020	MAPK1,MAPK3,MAP3K14	3/13
1_Member	GO Biological Processes	GO:0071356	cellular response to tumor necrosis factor	-6.87805	-4.68907	958,3717,5594,5595,7132	CD40,JAK2,MAPK1,MAPK3,TNFRSF1A	5/156
1_Member	KEGG Pathway	hsa05200	Pathways in cancer	-6.87709	-4.68907	818,3716,3717,5594,5595,6198,6774	CAMK2G,JAK1,JAK2,MAPK1,MAPK3,RPS6KB1,STAT3	7/533
1_Member	Reactome Gene Sets	R-HSA-5683057	MAPK family signaling cascades	-6.78214	-4.60016	818,3716,3717,5594,5595,7297	CAMK2G,JAK1,JAK2,MAPK1,MAPK3,TYK2	6/325
1_Member	GO Biological Processes	GO:0048708	astrocyte differentiation	-6.67767	-4.50163	2908,5594,5595,6774	NR3C1,MAPK1,MAPK3,STAT3	4/66
1_Member	WikiPathways	WP2324	AGE RAGE pathway	-6.67767	-4.50163	3717,5594,5595,6774	JAK2,MAPK1,MAPK3,STAT3	4/66
1_Member	WikiPathways	WP4172	PI3K Akt signaling	-6.67452	-4.50143	3716,3717,5594,5595,6198,7148	JAK1,JAK2,MAPK1,MAPK3,RPS6KB1,TNXB	6/339
1_Member	Reactome Gene Sets	R-HSA-6802952	Signaling by BRAF and RAF1 fusions	-6.65116	-4.481	818,3717,5594,5595	CAMK2G,JAK2,MAPK1,MAPK3	4/67
1_Member	KEGG Pathway	hsa05221	Acute myeloid leukemia	-6.62506	-4.45949	5594,5595,6198,6774	MAPK1,MAPK3,RPS6KB1,STAT3	4/68
1_Member	Canonical Pathways	M121	PID MTOR 4PATHWAY	-6.59935	-4.44353	5594,5595,6198,7532	MAPK1,MAPK3,RPS6KB1,YWHAG	4/69
1_Member	WikiPathways	WP5158	Urotensin II mediated signaling	-6.59935	-4.44353	3717,5594,5595,6774	JAK2,MAPK1,MAPK3,STAT3	4/69
1_Member	WikiPathways	WP5293	Acute myeloid leukemia	-6.59935	-4.44353	5594,5595,6198,6774	MAPK1,MAPK3,RPS6KB1,STAT3	4/69
1_Member	KEGG Pathway	hsa04917	Prolactin signaling pathway	-6.54908	-4.39606	3717,5594,5595,6774	JAK2,MAPK1,MAPK3,STAT3	4/71
1_Member	KEGG Pathway	hsa05140	Leishmaniasis	-6.40657	-4.27541	3716,3717,5594,5595	JAK1,JAK2,MAPK1,MAPK3	4/77
1_Member	WikiPathways	WP734	Serotonin receptor 4 6 7 and NR3C signaling	-6.3788	-4.25029	2908,5594,5595	NR3C1,MAPK1,MAPK3	3/19
1_Member	KEGG Pathway	hsa05205	Proteoglycans in cancer	-6.29977	-4.18687	818,5594,5595,6198,6774	CAMK2G,MAPK1,MAPK3,RPS6KB1,STAT3	5/204
1_Member	KEGG Pathway	hsa05203	Viral carcinogenesis	-6.28927	-4.17892	3716,5594,5595,6774,7532	JAK1,MAPK1,MAPK3,STAT3,YWHAG	5/205
1_Member	Reactome Gene Sets	R-HSA-6802957	Oncogenic MAPK signaling	-6.25411	-4.14881	818,3717,5594,5595	CAMK2G,JAK2,MAPK1,MAPK3	4/84
1_Member	WikiPathways	WP4298	Acute viral myocarditis	-6.23341	-4.1331	3716,5594,5595,6774	JAK1,MAPK1,MAPK3,STAT3	4/85
1_Member	KEGG Pathway	hsa05207	Chemical carcinogenesis - receptor activation	-6.18713	-4.09175	3717,5594,5595,6198,6774	JAK2,MAPK1,MAPK3,RPS6KB1,STAT3	5/215
1_Member	Reactome Gene Sets	R-HSA-198753	ERK/MAPK targets	-6.17828	-4.08778	4208,5594,5595	MEF2C,MAPK1,MAPK3	3/22
1_Member	WikiPathways	WP5094	Orexin receptor pathway	-6.17277	-4.08469	5594,5595,6198,6774	MAPK1,MAPK3,RPS6KB1,STAT3	4/88
1_Member	GO Biological Processes	GO:0000165	MAPK cascade	-6.15744	-4.07176	4208,5594,5595,9020,50488	MEF2C,MAPK1,MAPK3,MAP3K14,MINK1	5/218
1_Member	WikiPathways	WP231	TNF alpha signaling	-6.15303	-4.06975	5594,5595,7132,9020	MAPK1,MAPK3,TNFRSF1A,MAP3K14	4/89
1_Member	Reactome Gene Sets	R-HSA-9700206	Signaling by ALK in cancer	-6.11422	-4.03867	5594,5595,6774,7297	MAPK1,MAPK3,STAT3,TYK2	4/91
1_Member	Reactome Gene Sets	R-HSA-9725370	Signaling by ALK fusions and activated point mutants	-6.11422	-4.03867	5594,5595,6774,7297	MAPK1,MAPK3,STAT3,TYK2	4/91
1_Member	GO Biological Processes	GO:0007169	cell surface receptor protein tyrosine kinase signaling pathway	-6.11251	-4.03867	3716,3717,5594,5595,6774,7297	JAK1,JAK2,MAPK1,MAPK3,STAT3,TYK2	6/423
1_Member	WikiPathways	WP2035	Follicle stimulating hormone FSH signaling	-6.06004	-3.99013	5594,5595,6198	MAPK1,MAPK3,RPS6KB1	3/24
1_Member	WikiPathways	WP75	Toll like receptor signaling	-6.03917	-3.97228	942,958,5594,5595	CD86,CD40,MAPK1,MAPK3	4/95
1_Member	KEGG Pathway	hsa04666	Fc gamma R-mediated phagocytosis	-5.98499	-3.92039	5594,5595,6198,50807	MAPK1,MAPK3,RPS6KB1,ASAP1	4/98
1_Member	KEGG Pathway	hsa04933	AGE-RAGE signaling pathway in diabetic complications	-5.93248	-3.87469	3717,5594,5595,6774	JAK2,MAPK1,MAPK3,STAT3	4/101
1_Member	Canonical Pathways	M1718	SIG IL4RECEPTOR IN B LYPHOCYTES	-5.9008	-3.84525	3716,5594,5595	JAK1,MAPK1,MAPK3	3/27
1_Member	WikiPathways	WP382	MAPK signaling	-5.89046	-3.83714	4208,5594,5595,7132,9020	MEF2C,MAPK1,MAPK3,TNFRSF1A,MAP3K14	5/247
1_Member	WikiPathways	WP1544	MicroRNAs in cardiomyocyte hypertrophy	-5.88156	-3.83047	5594,5595,6774,9020	MAPK1,MAPK3,STAT3,MAP3K14	4/104
1_Member	KEGG Pathway	hsa04625	C-type lectin receptor signaling pathway	-5.86492	-3.81604	868,5594,5595,9020	CBLB,MAPK1,MAPK3,MAP3K14	4/105
1_Member	Canonical Pathways	M55	PID S1P S1P3 PATHWAY	-5.80461	-3.76661	3717,5594,5595	JAK2,MAPK1,MAPK3	3/29
1_Member	Reactome Gene Sets	R-HSA-442742	CREB1 phosphorylation through NMDA receptor-mediated activation of RAS signaling	-5.80461	-3.76661	818,5594,5595	CAMK2G,MAPK1,MAPK3	3/29
1_Member	WikiPathways	WP2263	Androgen receptor network in prostate cancer	-5.79996	-3.76411	3716,5594,5595,6774	JAK1,MAPK1,MAPK3,STAT3	4/109
1_Member	Canonical Pathways	M63	PID AVB3 OPN PATHWAY	-5.7151	-3.68981	5594,5595,9020	MAPK1,MAPK3,MAP3K14	3/31
1_Member	Reactome Gene Sets	R-HSA-450282	MAPK targets/ Nuclear events mediated by MAP kinases	-5.7151	-3.68981	4208,5594,5595	MEF2C,MAPK1,MAPK3	3/31
1_Member	GO Biological Processes	GO:0050804	modulation of chemical synaptic transmission	-5.71164	-3.68957	3717,4208,5594,5595,6198,7532	JAK2,MEF2C,MAPK1,MAPK3,RPS6KB1,YWHAG	6/496
1_Member	Reactome Gene Sets	R-HSA-187037	Signaling by NTRK1 (TRKA)	-5.70698	-3.68957	4208,5594,5595,6774	MEF2C,MAPK1,MAPK3,STAT3	4/115
1_Member	KEGG Pathway	hsa04725	Cholinergic synapse	-5.70698	-3.68957	818,3717,5594,5595	CAMK2G,JAK2,MAPK1,MAPK3	4/115
1_Member	GO Biological Processes	GO:0099177	regulation of trans-synaptic signaling	-5.70658	-3.68957	3717,4208,5594,5595,6198,7532	JAK2,MEF2C,MAPK1,MAPK3,RPS6KB1,YWHAG	6/497
1_Member	Reactome Gene Sets	R-HSA-2871796	FCERI mediated MAPK activation	-5.67257	-3.66166	5594,5595,9402	MAPK1,MAPK3,GRAP2	3/32
1_Member	KEGG Pathway	hsa04668	TNF signaling pathway	-5.64772	-3.64083	5594,5595,7132,9020	MAPK1,MAPK3,TNFRSF1A,MAP3K14	4/119
1_Member	Reactome Gene Sets	R-HSA-9725371	Nuclear events stimulated by ALK signaling in cancer	-5.6314	-3.63048	5594,5595,6774	MAPK1,MAPK3,STAT3	3/33
1_Member	Reactome Gene Sets	R-HSA-5673001	RAF/MAP kinase cascade	-5.62357	-3.62461	818,3716,3717,5594,5595	CAMK2G,JAK1,JAK2,MAPK1,MAPK3	5/280
1_Member	KEGG Pathway	hsa04935	Growth hormone synthesis, secretion and action	-5.60461	-3.60761	3717,5594,5595,6774	JAK2,MAPK1,MAPK3,STAT3	4/122
1_Member	Canonical Pathways	M12705	SIG CD40PATHWAYMAP	-5.59151	-3.60419	958,5594,5595	CD40,MAPK1,MAPK3	3/34
1_Member	Canonical Pathways	M270	PID MAPK TRK PATHWAY	-5.59151	-3.60419	4208,5594,5595	MEF2C,MAPK1,MAPK3	3/34
1_Member	Reactome Gene Sets	R-HSA-9634815	Transcriptional Regulation by NPAS4	-5.59151	-3.60419	2908,5594,5595	NR3C1,MAPK1,MAPK3	3/34
1_Member	WikiPathways	WP313	Hepatocyte growth factor receptor signaling	-5.59151	-3.60419	5594,5595,6774	MAPK1,MAPK3,STAT3	3/34
1_Member	Canonical Pathways	M127	PID ERBB1 RECEPTOR PROXIMAL PATHWAY	-5.55282	-3.56931	5594,5595,6774	MAPK1,MAPK3,STAT3	3/35
1_Member	Reactome Gene Sets	R-HSA-9006934	Signaling by Receptor Tyrosine Kinases	-5.52681	-3.54519	3717,4208,5594,5595,6774,9402	JAK2,MEF2C,MAPK1,MAPK3,STAT3,GRAP2	6/534
1_Member	KEGG Pathway	hsa04010	MAPK signaling pathway	-5.47726	-3.50498	4208,5594,5595,7132,9020	MEF2C,MAPK1,MAPK3,TNFRSF1A,MAP3K14	5/300
1_Member	Canonical Pathways	M13	PID ERBB4 PATHWAY	-5.44327	-3.47748	3717,5594,5595	JAK2,MAPK1,MAPK3	3/38
1_Member	WikiPathways	WP2036	TNF related weak inducer of apoptosis TWEAK signaling	-5.44327	-3.47748	5594,5595,9020	MAPK1,MAPK3,MAP3K14	3/38
1_Member	Reactome Gene Sets	R-HSA-166520	Signaling by NTRKs	-5.44243	-3.47748	4208,5594,5595,6774	MEF2C,MAPK1,MAPK3,STAT3	4/134
1_Member	KEGG Pathway	hsa04210	Apoptosis	-5.41686	-3.45553	5594,5595,7132,9020	MAPK1,MAPK3,TNFRSF1A,MAP3K14	4/136
1_Member	GO Biological Processes	GO:0048645	animal organ formation	-5.40873	-3.4492	4208,5594,5595	MEF2C,MAPK1,MAPK3	3/39
1_Member	KEGG Pathway	hsa04114	Oocyte meiosis	-5.37923	-3.42327	818,5594,5595,7532	CAMK2G,MAPK1,MAPK3,YWHAG	4/139
1_Member	KEGG Pathway	hsa04371	Apelin signaling pathway	-5.36687	-3.41445	4208,5594,5595,6198	MEF2C,MAPK1,MAPK3,RPS6KB1	4/140
1_Member	GO Biological Processes	GO:0030335	positive regulation of cell migration	-5.25731	-3.3119	958,3717,5594,5595,6198,6774	CD40,JAK2,MAPK1,MAPK3,RPS6KB1,STAT3	6/595
1_Member	Canonical Pathways	M144	PID CERAMIDE PATHWAY	-5.24874	-3.30782	5594,5595,7132	MAPK1,MAPK3,TNFRSF1A	3/44
1_Member	GO Biological Processes	GO:0032869	cellular response to insulin stimulus	-5.24805	-3.30782	5594,5595,6198,7532	MAPK1,MAPK3,RPS6KB1,YWHAG	4/150
1_Member	KEGG Pathway	hsa04921	Oxytocin signaling pathway	-5.20279	-3.26768	818,4208,5594,5595	CAMK2G,MEF2C,MAPK1,MAPK3	4/154
1_Member	WikiPathways	WP4566	Translation inhibitors in chronically activated PDGFRA cells	-5.18994	-3.25821	5594,5595,6198	MAPK1,MAPK3,RPS6KB1	3/46
1_Member	KEGG Pathway	hsa04148	Efferocytosis	-5.18061	-3.25056	818,3717,5594,5595	CAMK2G,JAK2,MAPK1,MAPK3	4/156
1_Member	GO Biological Processes	GO:0007167	enzyme-linked receptor protein signaling pathway	-5.16321	-3.23483	3716,3717,5594,5595,6774,7297	JAK1,JAK2,MAPK1,MAPK3,STAT3,TYK2	6/618
1_Member	KEGG Pathway	hsa04150	mTOR signaling pathway	-5.15872	-3.23368	5594,5595,6198,7132	MAPK1,MAPK3,RPS6KB1,TNFRSF1A	4/158
1_Member	GO Biological Processes	GO:2000147	positive regulation of cell motility	-5.14324	-3.21985	958,3717,5594,5595,6198,6774	CD40,JAK2,MAPK1,MAPK3,RPS6KB1,STAT3	6/623
1_Member	Canonical Pathways	M92	PID ANGIOPOIETIN RECEPTOR PATHWAY	-5.1065	-3.18803	5594,5595,6198	MAPK1,MAPK3,RPS6KB1	3/49
1_Member	WikiPathways	WP2637	Interleukin 1 IL 1 structural pathway	-5.1065	-3.18803	5594,5595,9020	MAPK1,MAPK3,MAP3K14	3/49
1_Member	GO Biological Processes	GO:0040017	positive regulation of locomotion	-5.08823	-3.17139	958,3717,5594,5595,6198,6774	CD40,JAK2,MAPK1,MAPK3,RPS6KB1,STAT3	6/637
1_Member	WikiPathways	WP3929	Chemokine signaling	-5.08431	-3.1691	3717,5594,5595,6774	JAK2,MAPK1,MAPK3,STAT3	4/165
1_Member	WikiPathways	WP4539	Synaptic signaling associated with autism spectrum disorder	-5.05375	-3.14303	5594,5595,6198	MAPK1,MAPK3,RPS6KB1	3/51
1_Member	WikiPathways	WP195	IL1 signaling	-4.97849	-3.07448	5594,5595,9020	MAPK1,MAPK3,MAP3K14	3/54
1_Member	WikiPathways	WP560	TGF beta receptor signaling	-4.95436	-3.05349	3716,5595,6774	JAK1,MAPK3,STAT3	3/55
1_Member	Reactome Gene Sets	R-HSA-109581	Apoptosis	-4.93526	-3.03752	5594,5595,6774,7532	MAPK1,MAPK3,STAT3,YWHAG	4/180
1_Member	WikiPathways	WP3646	Hepatitis C and hepatocellular carcinoma	-4.93067	-3.03448	3716,5595,6774	JAK1,MAPK3,STAT3	3/56
1_Member	WikiPathways	WP4205	MET in type 1 papillary renal cell carcinoma	-4.86214	-2.97667	5594,5595,6774	MAPK1,MAPK3,STAT3	3/59
1_Member	WikiPathways	WP4816	TGF beta receptor signaling in skeletal dysplasias	-4.86214	-2.97667	3716,5595,6774	JAK1,MAPK3,STAT3	3/59
1_Member	KEGG Pathway	hsa04621	NOD-like receptor signaling pathway	-4.85187	-2.96792	3716,5594,5595,7297	JAK1,MAPK1,MAPK3,TYK2	4/189
1_Member	Canonical Pathways	M7	PID FCER1 PATHWAY	-4.84009	-2.95914	868,5594,5595	CBLB,MAPK1,MAPK3	3/60
1_Member	Canonical Pathways	M187	PID TRKR PATHWAY	-4.81841	-2.94193	5594,5595,6774	MAPK1,MAPK3,STAT3	3/61
1_Member	Reactome Gene Sets	R-HSA-198725	Nuclear Events (kinase and transcription factor activation)	-4.81841	-2.94193	4208,5594,5595	MEF2C,MAPK1,MAPK3	3/61
1_Member	KEGG Pathway	hsa04062	Chemokine signaling pathway	-4.81612	-2.94112	3717,5594,5595,6774	JAK2,MAPK1,MAPK3,STAT3	4/193
1_Member	Reactome Gene Sets	R-HSA-2559583	Cellular Senescence	-4.79853	-2.92942	5594,5595,6774,50488	MAPK1,MAPK3,STAT3,MINK1	4/195
1_Member	WikiPathways	WP3863	T cell antigen receptor TCR pathway during Staphylococcus aureus infection	-4.7971	-2.92942	5595,9020,9402	MAPK3,MAP3K14,GRAP2	3/62
1_Member	Canonical Pathways	M10	PID BCR 5PATHWAY	-4.77613	-2.91135	818,5594,5595	CAMK2G,MAPK1,MAPK3	3/63
1_Member	Canonical Pathways	M8	PID ENDOTHELIN PATHWAY	-4.77613	-2.91135	3717,5594,5595	JAK2,MAPK1,MAPK3	3/63
1_Member	Reactome Gene Sets	R-HSA-450294	MAP kinase activation	-4.75551	-2.89503	4208,5594,5595	MEF2C,MAPK1,MAPK3	3/64
1_Member	GO Biological Processes	GO:0018108	peptidyl-tyrosine phosphorylation	-4.73521	-2.87758	3716,3717,5595	JAK1,JAK2,MAPK3	3/65
1_Member	GO Biological Processes	GO:0018212	peptidyl-tyrosine modification	-4.69556	-2.84358	3716,3717,5595	JAK1,JAK2,MAPK3	3/67
1_Member	Canonical Pathways	M105	PID TELOMERASE PATHWAY	-4.69556	-2.84358	5594,5595,6198	MAPK1,MAPK3,RPS6KB1	3/67
1_Member	KEGG Pathway	hsa04720	Long-term potentiation	-4.69556	-2.84358	818,5594,5595	CAMK2G,MAPK1,MAPK3	3/67
1_Member	WikiPathways	WP5087	Pleural mesothelioma	-4.67759	-2.82839	3716,5594,5595,6198,50488	JAK1,MAPK1,MAPK3,RPS6KB1,MINK1	5/439
1_Member	WikiPathways	WP3303	RAC1 PAK1 p38 MMP2 pathway	-4.67619	-2.82839	5594,5595,6774	MAPK1,MAPK3,STAT3	3/68
1_Member	Reactome Gene Sets	R-HSA-5357801	Programmed Cell Death	-4.64813	-2.80584	5594,5595,6774,7532	MAPK1,MAPK3,STAT3,YWHAG	4/213
1_Member	KEGG Pathway	hsa05170	Human immunodeficiency virus 1 infection	-4.64813	-2.80584	5594,5595,6198,7132	MAPK1,MAPK3,RPS6KB1,TNFRSF1A	4/213
1_Member	Canonical Pathways	M81	PID CDC42 PATHWAY	-4.63832	-2.79876	5594,5595,6198	MAPK1,MAPK3,RPS6KB1	3/70
1_Member	Reactome Gene Sets	R-HSA-448424	Interleukin-17 signaling	-4.60153	-2.77078	4208,5594,5595	MEF2C,MAPK1,MAPK3	3/72
1_Member	WikiPathways	WP4255	Non small cell lung cancer	-4.60153	-2.77078	5594,5595,6774	MAPK1,MAPK3,STAT3	3/72
1_Member	GO Biological Processes	GO:0010001	glial cell differentiation	-4.60091	-2.77078	2908,5594,5595,6774	NR3C1,MAPK1,MAPK3,STAT3	4/219
1_Member	GO Biological Processes	GO:0032868	response to insulin	-4.60091	-2.77078	5594,5595,6198,7532	MAPK1,MAPK3,RPS6KB1,YWHAG	4/219
1_Member	KEGG Pathway	hsa05223	Non-small cell lung cancer	-4.58353	-2.75473	5594,5595,6774	MAPK1,MAPK3,STAT3	3/73
1_Member	Canonical Pathways	M160	PID AVB3 INTEGRIN PATHWAY	-4.56579	-2.73963	5594,5595,6198	MAPK1,MAPK3,RPS6KB1	3/74
1_Member	KEGG Pathway	hsa05214	Glioma	-4.53102	-2.71011	818,5594,5595	CAMK2G,MAPK1,MAPK3	3/76
1_Member	GO Biological Processes	GO:0031669	cellular response to nutrient levels	-4.48127	-2.66426	5594,5595,6198,7532	MAPK1,MAPK3,RPS6KB1,YWHAG	4/235
1_Member	Reactome Gene Sets	R-HSA-438064	Post NMDA receptor activation events	-4.46421	-2.6485	818,5594,5595	CAMK2G,MAPK1,MAPK3	3/80
1_Member	GO Biological Processes	GO:0031667	response to nutrient levels	-4.44952	-2.63638	958,5594,5595,6198,7532	CD40,MAPK1,MAPK3,RPS6KB1,YWHAG	5/490
1_Member	Canonical Pathways	M115	PID REG GR PATHWAY	-4.43209	-2.62022	2908,5594,5595	NR3C1,MAPK1,MAPK3	3/82
1_Member	KEGG Pathway	hsa05131	Shigellosis	-4.38333	-2.574	5594,5595,6198,7132	MAPK1,MAPK3,RPS6KB1,TNFRSF1A	4/249
1_Member	KEGG Pathway	hsa05210	Colorectal cancer	-4.35517	-2.54838	5594,5595,6198	MAPK1,MAPK3,RPS6KB1	3/87
1_Member	GO Biological Processes	GO:0018193	peptidyl-amino acid modification	-4.34274	-2.53721	3716,3717,5594,5595,6198	JAK1,JAK2,MAPK1,MAPK3,RPS6KB1	5/516
1_Member	Reactome Gene Sets	R-HSA-3371556	Cellular response to heat stress	-4.32566	-2.52389	818,5594,5595	CAMK2G,MAPK1,MAPK3	3/89
1_Member	GO Biological Processes	GO:0014033	neural crest cell differentiation	-4.29683	-2.49631	4208,5594,5595	MEF2C,MAPK1,MAPK3	3/91
1_Member	WikiPathways	WP1772	Apoptosis modulation and signaling	-4.28266	-2.48338	5595,7132,9020	MAPK3,TNFRSF1A,MAP3K14	3/92
1_Member	Reactome Gene Sets	R-HSA-442755	Activation of NMDA receptors and postsynaptic events	-4.26864	-2.47307	818,5594,5595	CAMK2G,MAPK1,MAPK3	3/93
1_Member	KEGG Pathway	hsa04912	GnRH signaling pathway	-4.26864	-2.47307	818,5594,5595	CAMK2G,MAPK1,MAPK3	3/93
1_Member	Reactome Gene Sets	R-HSA-168142	Toll Like Receptor 10 (TLR10) Cascade	-4.21409	-2.42462	4208,5594,5595	MEF2C,MAPK1,MAPK3	3/97
1_Member	Reactome Gene Sets	R-HSA-168176	Toll Like Receptor 5 (TLR5) Cascade	-4.21409	-2.42462	4208,5594,5595	MEF2C,MAPK1,MAPK3	3/97
1_Member	Reactome Gene Sets	R-HSA-975871	MyD88 cascade initiated on plasma membrane	-4.21409	-2.42462	4208,5594,5595	MEF2C,MAPK1,MAPK3	3/97
1_Member	KEGG Pathway	hsa04713	Circadian entrainment	-4.21409	-2.42462	818,5594,5595	CAMK2G,MAPK1,MAPK3	3/97
1_Member	GO Biological Processes	GO:0042063	gliogenesis	-4.20965	-2.42139	2908,5594,5595,6774	NR3C1,MAPK1,MAPK3,STAT3	4/276
1_Member	GO Biological Processes	GO:1903432	regulation of TORC1 signaling	-4.20081	-2.41617	5595,6198,7532	MAPK3,RPS6KB1,YWHAG	3/98
1_Member	KEGG Pathway	hsa01522	Endocrine resistance	-4.18768	-2.40543	5594,5595,6198	MAPK1,MAPK3,RPS6KB1	3/99
1_Member	KEGG Pathway	hsa05231	Choline metabolism in cancer	-4.18768	-2.40543	5594,5595,6198	MAPK1,MAPK3,RPS6KB1	3/99
1_Member	KEGG Pathway	hsa04916	Melanogenesis	-4.1618	-2.38193	818,5594,5595	CAMK2G,MAPK1,MAPK3	3/101
1_Member	Reactome Gene Sets	R-HSA-975138	TRAF6 mediated induction of NFkB and MAP kinases upon TLR7/8 or 9 activation	-4.13645	-2.36248	4208,5594,5595	MEF2C,MAPK1,MAPK3	3/103
1_Member	KEGG Pathway	hsa05142	Chagas disease	-4.13645	-2.36248	5594,5595,7132	MAPK1,MAPK3,TNFRSF1A	3/103
1_Member	Reactome Gene Sets	R-HSA-975155	MyD88 dependent cascade initiated on endosome	-4.12396	-2.35349	4208,5594,5595	MEF2C,MAPK1,MAPK3	3/104
1_Member	Reactome Gene Sets	R-HSA-168164	Toll Like Receptor 3 (TLR3) Cascade	-4.09936	-2.33235	4208,5594,5595	MEF2C,MAPK1,MAPK3	3/106
1_Member	Reactome Gene Sets	R-HSA-168181	Toll Like Receptor 7/8 (TLR7/8) Cascade	-4.07522	-2.31394	4208,5594,5595	MEF2C,MAPK1,MAPK3	3/108
1_Member	WikiPathways	WP5353	Macrophage stimulating protein MSP signaling	-4.07522	-2.31394	5594,5595,6198	MAPK1,MAPK3,RPS6KB1	3/108
1_Member	KEGG Pathway	hsa04350	TGF-beta signaling pathway	-4.07522	-2.31394	5594,5595,6198	MAPK1,MAPK3,RPS6KB1	3/108
1_Member	Reactome Gene Sets	R-HSA-2559582	Senescence-Associated Secretory Phenotype (SASP)	-4.05154	-2.29366	5594,5595,6774	MAPK1,MAPK3,STAT3	3/110
1_Member	WikiPathways	WP4874	CAMKK2 pathway	-4.05154	-2.29366	5594,5595,6198	MAPK1,MAPK3,RPS6KB1	3/110
1_Member	Reactome Gene Sets	R-HSA-166166	MyD88-independent TLR4 cascade	-4.03987	-2.28647	4208,5594,5595	MEF2C,MAPK1,MAPK3	3/111
1_Member	Reactome Gene Sets	R-HSA-168138	Toll Like Receptor 9 (TLR9) Cascade	-4.03987	-2.28647	4208,5594,5595	MEF2C,MAPK1,MAPK3	3/111
1_Member	Reactome Gene Sets	R-HSA-6811558	PI5P, PP2A and IER3 Regulate PI3K/AKT Signaling	-4.03987	-2.28647	942,5594,5595	CD86,MAPK1,MAPK3	3/111
1_Member	Reactome Gene Sets	R-HSA-937061	TRIF (TICAM1)-mediated TLR4 signaling	-4.03987	-2.28647	4208,5594,5595	MEF2C,MAPK1,MAPK3	3/111
1_Member	WikiPathways	WP5426	HDAC6 interactions in the central nervous system	-4.0283	-2.27602	2908,5594,5595	NR3C1,MAPK1,MAPK3	3/112
1_Member	Reactome Gene Sets	R-HSA-166058	MyD88:MAL(TIRAP) cascade initiated on plasma membrane	-4.01684	-2.26789	4208,5594,5595	MEF2C,MAPK1,MAPK3	3/113
1_Member	Reactome Gene Sets	R-HSA-168188	Toll Like Receptor TLR6:TLR2 Cascade	-4.01684	-2.26789	4208,5594,5595	MEF2C,MAPK1,MAPK3	3/113
1_Member	WikiPathways	WP3391	Senescence associated secretory phenotype SASP	-4.01684	-2.26789	5594,5595,6774	MAPK1,MAPK3,STAT3	3/113
1_Member	KEGG Pathway	hsa05206	MicroRNAs in cancer	-4.00383	-2.25708	5594,5595,6774,7148	MAPK1,MAPK3,STAT3,TNXB	4/312
1_Member	KEGG Pathway	hsa04928	Parathyroid hormone synthesis, secretion and action	-3.99423	-2.24858	4208,5594,5595	MEF2C,MAPK1,MAPK3	3/115
1_Member	Reactome Gene Sets	R-HSA-9006925	Intracellular signaling by second messengers	-3.98781	-2.24326	818,942,5594,5595	CAMK2G,CD86,MAPK1,MAPK3	4/315
1_Member	Reactome Gene Sets	R-HSA-168179	Toll Like Receptor TLR1:TLR2 Cascade	-3.98308	-2.24179	4208,5594,5595	MEF2C,MAPK1,MAPK3	3/116
1_Member	Reactome Gene Sets	R-HSA-181438	Toll Like Receptor 2 (TLR2) Cascade	-3.98308	-2.24179	4208,5594,5595	MEF2C,MAPK1,MAPK3	3/116
1_Member	Reactome Gene Sets	R-HSA-199418	Negative regulation of the PI3K/AKT network	-3.96106	-2.22517	942,5594,5595	CD86,MAPK1,MAPK3	3/118
1_Member	WikiPathways	WP3931	Embryonic stem cell pluripotency pathways	-3.96106	-2.22517	3716,5594,6774	JAK1,MAPK1,STAT3	3/118
1_Member	Reactome Gene Sets	R-HSA-8878166	Transcriptional regulation by RUNX2	-3.93943	-2.2078	2908,5594,5595	NR3C1,MAPK1,MAPK3	3/120
1_Member	WikiPathways	WP5470	Effect of omega 3 PUFA on Huntington 39 s disease pathways	-3.93943	-2.2078	5594,5595,6198	MAPK1,MAPK3,RPS6KB1	3/120
1_Member	KEGG Pathway	hsa04722	Neurotrophin signaling pathway	-3.93943	-2.2078	818,5594,5595	CAMK2G,MAPK1,MAPK3	3/120
1_Member	KEGG Pathway	hsa04071	Sphingolipid signaling pathway	-3.91817	-2.18866	5594,5595,7132	MAPK1,MAPK3,TNFRSF1A	3/122
1_Member	GO Biological Processes	GO:0030278	regulation of ossification	-3.89726	-2.17091	4208,5594,5595	MEF2C,MAPK1,MAPK3	3/124
1_Member	Reactome Gene Sets	R-HSA-2559580	Oxidative Stress Induced Senescence	-3.89726	-2.17091	5594,5595,50488	MAPK1,MAPK3,MINK1	3/124
1_Member	GO Biological Processes	GO:0035051	cardiocyte differentiation	-3.88693	-2.16163	4208,5594,5595	MEF2C,MAPK1,MAPK3	3/125
1_Member	GO Biological Processes	GO:0035270	endocrine system development	-3.85646	-2.13429	2908,5594,5595	NR3C1,MAPK1,MAPK3	3/128
1_Member	KEGG Pathway	hsa04068	FoxO signaling pathway	-3.80727	-2.08821	5594,5595,6774	MAPK1,MAPK3,STAT3	3/133
1_Member	Reactome Gene Sets	R-HSA-2454202	Fc epsilon receptor (FCERI) signaling	-3.79767	-2.07963	5594,5595,9402	MAPK1,MAPK3,GRAP2	3/134
1_Member	Reactome Gene Sets	R-HSA-166016	Toll Like Receptor 4 (TLR4) Cascade	-3.67909	-1.96718	4208,5594,5595	MEF2C,MAPK1,MAPK3	3/147
1_Member	KEGG Pathway	hsa05224	Breast cancer	-3.67042	-1.95953	5594,5595,6198	MAPK1,MAPK3,RPS6KB1	3/148
1_Member	Reactome Gene Sets	R-HSA-1169410	Antiviral mechanism by IFN-stimulated genes	-3.66181	-1.95294	3716,5595,6774	JAK1,MAPK3,STAT3	3/149
1_Member	GO Biological Processes	GO:0032006	regulation of TOR signaling	-3.65326	-1.9464	5595,6198,7532	MAPK3,RPS6KB1,YWHAG	3/150
1_Member	KEGG Pathway	hsa05226	Gastric cancer	-3.65326	-1.9464	5594,5595,6198	MAPK1,MAPK3,RPS6KB1	3/150
1_Member	KEGG Pathway	hsa04261	Adrenergic signaling in cardiomyocytes	-3.61965	-1.91777	818,5594,5595	CAMK2G,MAPK1,MAPK3	3/154
1_Member	WikiPathways	WP4262	Breast cancer pathway	-3.61138	-1.91247	5594,5595,6198	MAPK1,MAPK3,RPS6KB1	3/155
1_Member	KEGG Pathway	hsa04934	Cushing syndrome	-3.61138	-1.91247	818,5594,5595	CAMK2G,MAPK1,MAPK3	3/155
1_Member	GO Biological Processes	GO:0002520	immune system development	-3.52397	-1.83576	868,5594,5595	CBLB,MAPK1,MAPK3	3/166
1_Member	KEGG Pathway	hsa04022	cGMP-PKG signaling pathway	-3.52397	-1.83576	4208,5594,5595	MEF2C,MAPK1,MAPK3	3/166
1_Member	KEGG Pathway	hsa04140	Autophagy - animal	-3.50117	-1.81487	5594,5595,6198	MAPK1,MAPK3,RPS6KB1	3/169
1_Member	KEGG Pathway	hsa05225	Hepatocellular carcinoma	-3.49366	-1.80832	5594,5595,6198	MAPK1,MAPK3,RPS6KB1	3/170
1_Member	Reactome Gene Sets	R-HSA-168898	Toll-like Receptor Cascades	-3.47878	-1.79535	4208,5594,5595	MEF2C,MAPK1,MAPK3	3/172
1_Member	GO Biological Processes	GO:0048762	mesenchymal cell differentiation	-3.46408	-1.78537	4208,5594,5595	MEF2C,MAPK1,MAPK3	3/174
1_Member	GO Biological Processes	GO:0009267	cellular response to starvation	-3.4568	-1.77903	5594,5595,7532	MAPK1,MAPK3,YWHAG	3/175
1_Member	GO Biological Processes	GO:0048863	stem cell differentiation	-3.40003	-1.72413	4208,5594,5595	MEF2C,MAPK1,MAPK3	3/183
1_Member	KEGG Pathway	hsa04360	Axon guidance	-3.39312	-1.71815	818,5594,5595	CAMK2G,MAPK1,MAPK3	3/184
1_Member	GO Biological Processes	GO:0071248	cellular response to metal ion	-3.36585	-1.69274	4208,5594,5595	MEF2C,MAPK1,MAPK3	3/188
1_Member	WikiPathways	WP306	Focal adhesion	-3.29385	-1.62719	5594,5595,7148	MAPK1,MAPK3,TNXB	3/199
1_Member	KEGG Pathway	hsa05022	Pathways of neurodegeneration - multiple diseases	-3.28094	-1.6152	818,5594,5595,7132	CAMK2G,MAPK1,MAPK3,TNFRSF1A	4/483
1_Member	KEGG Pathway	hsa04510	Focal adhesion	-3.26869	-1.60568	5594,5595,7148	MAPK1,MAPK3,TNXB	3/203
1_Member	KEGG Pathway	hsa05130	Pathogenic Escherichia coli infection	-3.26869	-1.60568	5594,5595,7132	MAPK1,MAPK3,TNFRSF1A	3/203
1_Member	Reactome Gene Sets	R-HSA-112314	Neurotransmitter receptors and postsynaptic signal transmission	-3.25631	-1.5951	818,5594,5595	CAMK2G,MAPK1,MAPK3	3/205
1_Member	GO Biological Processes	GO:0042594	response to starvation	-3.19036	-1.53095	5594,5595,7532	MAPK1,MAPK3,YWHAG	3/216
1_Member	KEGG Pathway	hsa04024	cAMP signaling pathway	-3.13337	-1.47844	818,5594,5595	CAMK2G,MAPK1,MAPK3	3/226
1_Member	KEGG Pathway	hsa05208	Chemical carcinogenesis - reactive oxygen species	-3.13337	-1.47844	5594,5595,9020	MAPK1,MAPK3,MAP3K14	3/226
1_Member	Reactome Gene Sets	R-HSA-69278	Cell Cycle, Mitotic	-3.03804	-1.38577	3717,5594,5595,7532	JAK2,MAPK1,MAPK3,YWHAG	4/561
1_Member	GO Biological Processes	GO:0060485	mesenchyme development	-3.02184	-1.37222	4208,5594,5595	MEF2C,MAPK1,MAPK3	3/247
1_Member	GO Biological Processes	GO:0032103	positive regulation of response to external stimulus	-3.00674	-1.35887	5594,5595,7132,10666	MAPK1,MAPK3,TNFRSF1A,CD226	4/572
1_Member	KEGG Pathway	hsa05132	Salmonella infection	-3.00173	-1.355	5594,5595,7132	MAPK1,MAPK3,TNFRSF1A	3/251
1_Member	GO Biological Processes	GO:0007507	heart development	-3.00112	-1.355	4208,5594,5595,7132	MEF2C,MAPK1,MAPK3,TNFRSF1A	4/574
1_Member	Reactome Gene Sets	R-HSA-76002	Platelet activation, signaling and aggregation	-2.94334	-1.30328	5594,5595,9749	MAPK1,MAPK3,PHACTR2	3/263
1_Member	WikiPathways	WP5124	Alzheimer 39 s disease	-2.94334	-1.30328	5594,5595,7132	MAPK1,MAPK3,TNFRSF1A	3/263
1_Member	WikiPathways	WP2059	Alzheimer 39 s disease and miRNA effects	-2.91984	-1.28064	5594,5595,7132	MAPK1,MAPK3,TNFRSF1A	3/268
1_Member	GO Biological Processes	GO:0032386	regulation of intracellular transport	-2.91056	-1.27308	3717,5594,5595	JAK2,MAPK1,MAPK3	3/270
1_Member	Reactome Gene Sets	R-HSA-112315	Transmission across Chemical Synapses	-2.91056	-1.27308	818,5594,5595	CAMK2G,MAPK1,MAPK3	3/270
1_Member	Reactome Gene Sets	R-HSA-1257604	PIP3 activates AKT signaling	-2.89679	-1.26016	942,5594,5595	CD86,MAPK1,MAPK3	3/273
1_Member	GO Biological Processes	GO:0090596	sensory organ morphogenesis	-2.88317	-1.24739	5594,5595,6774	MAPK1,MAPK3,STAT3	3/276
1_Member	Reactome Gene Sets	R-HSA-109582	Hemostasis	-2.87228	-1.23905	3717,5594,5595,9749	JAK2,MAPK1,MAPK3,PHACTR2	4/622
1_Member	GO Biological Processes	GO:0048562	embryonic organ morphogenesis	-2.8004	-1.17054	4208,5594,5595	MEF2C,MAPK1,MAPK3	3/295
1_Member	GO Biological Processes	GO:0051054	positive regulation of DNA metabolic process	-2.8004	-1.17054	958,5594,5595	CD40,MAPK1,MAPK3	3/295
1_Member	Reactome Gene Sets	R-HSA-1640170	Cell Cycle	-2.70039	-1.07637	3717,5594,5595,7532	JAK2,MAPK1,MAPK3,YWHAG	4/693
1_Member	Reactome Gene Sets	R-HSA-195258	RHO GTPase Effectors	-2.67677	-1.05523	5594,5595,7532	MAPK1,MAPK3,YWHAG	3/326
1_Member	GO Biological Processes	GO:0010038	response to metal ion	-2.59991	-0.979193	4208,5594,5595	MEF2C,MAPK1,MAPK3	3/347
1_Member	GO Biological Processes	GO:0006979	response to oxidative stress	-2.52786	-0.910421	3717,5594,5595	JAK2,MAPK1,MAPK3	3/368
1_Member	KEGG Pathway	hsa05010	Alzheimer disease	-2.45383	-0.839647	5594,5595,7132	MAPK1,MAPK3,TNFRSF1A	3/391
1_Member	Reactome Gene Sets	R-HSA-112316	Neuronal System	-2.39612	-0.784364	818,5594,5595	CAMK2G,MAPK1,MAPK3	3/410
1_Member	Reactome Gene Sets	R-HSA-68886	M Phase	-2.37559	-0.764631	5594,5595,7532	MAPK1,MAPK3,YWHAG	3/417
1_Member	GO Biological Processes	GO:0030003	intracellular monoatomic cation homeostasis	-2.34972	-0.740372	958,5594,5595	CD40,MAPK1,MAPK3	3/426
1_Member	GO Biological Processes	GO:0006873	intracellular monoatomic ion homeostasis	-2.32444	-0.717488	958,5594,5595	CD40,MAPK1,MAPK3	3/435
1_Member	GO Biological Processes	GO:0048568	embryonic organ development	-2.2782	-0.672041	4208,5594,5595	MEF2C,MAPK1,MAPK3	3/452
1_Member	GO Biological Processes	GO:0055080	monoatomic cation homeostasis	-2.15244	-0.548661	958,5594,5595	CD40,MAPK1,MAPK3	3/502
1_Member	GO Biological Processes	GO:0051052	regulation of DNA metabolic process	-2.13827	-0.535287	958,5594,5595	CD40,MAPK1,MAPK3	3/508
1_Member	GO Biological Processes	GO:0010638	positive regulation of organelle organization	-2.13126	-0.529063	5594,5595,50807	MAPK1,MAPK3,ASAP1	3/511
1_Member	GO Biological Processes	GO:0050801	monoatomic ion homeostasis	-2.12893	-0.527522	958,5594,5595	CD40,MAPK1,MAPK3	3/512
2_Summary	Reactome Gene Sets	R-HSA-1280215	Cytokine Signaling in Immune system	-14.3845	-10.5182	818,942,958,3716,3717,4208,5594,5595,6774,7132,7297,9020,9402,6198,2908,868,7532,10666,1315	CAMK2G,CD86,CD40,JAK1,JAK2,MEF2C,MAPK1,MAPK3,STAT3,TNFRSF1A,TYK2,MAP3K14,GRAP2,RPS6KB1,NR3C1,CBLB,YWHAG,CD226,COPB1	19/-
2_Member	Reactome Gene Sets	R-HSA-1280215	Cytokine Signaling in Immune system	-14.3845	-10.5182	818,942,958,3716,3717,4208,5594,5595,6774,7132,7297,9020,9402	CAMK2G,CD86,CD40,JAK1,JAK2,MEF2C,MAPK1,MAPK3,STAT3,TNFRSF1A,TYK2,MAP3K14,GRAP2	13/786
2_Member	KEGG Pathway	hsa05145	Toxoplasmosis	-13.7593	-10.115	958,3716,3717,5594,5595,6774,7132,7297	CD40,JAK1,JAK2,MAPK1,MAPK3,STAT3,TNFRSF1A,TYK2	8/111
2_Member	KEGG Pathway	hsa05167	Kaposi sarcoma-associated herpesvirus infection	-11.752	-8.58474	942,3716,3717,5594,5595,6774,7132,7297	CD86,JAK1,JAK2,MAPK1,MAPK3,STAT3,TNFRSF1A,TYK2	8/196
2_Member	Reactome Gene Sets	R-HSA-112411	MAPK1 (ERK2) activation	-10.422	-7.52581	3716,3717,5594,7297	JAK1,JAK2,MAPK1,TYK2	4/9
2_Member	Reactome Gene Sets	R-HSA-449147	Signaling by Interleukins	-10.2706	-7.41856	942,3716,3717,4208,5594,5595,6774,7132,7297	CD86,JAK1,JAK2,MEF2C,MAPK1,MAPK3,STAT3,TNFRSF1A,TYK2	9/473
2_Member	GO Biological Processes	GO:0060397	growth hormone receptor signaling pathway via JAK-STAT	-10.2004	-7.37757	3716,3717,6774,7297	JAK1,JAK2,STAT3,TYK2	4/10
2_Member	Reactome Gene Sets	R-HSA-1059683	Interleukin-6 signaling	-10.0043	-7.26235	3716,3717,6774,7297	JAK1,JAK2,STAT3,TYK2	4/11
2_Member	Reactome Gene Sets	R-HSA-9020956	Interleukin-27 signaling	-10.0043	-7.26235	3716,3717,6774,7297	JAK1,JAK2,STAT3,TYK2	4/11
2_Member	Reactome Gene Sets	R-HSA-8984722	Interleukin-35 Signalling	-9.82845	-7.09789	3716,3717,6774,7297	JAK1,JAK2,STAT3,TYK2	4/12
2_Member	Reactome Gene Sets	R-HSA-6783783	Interleukin-10 signaling	-9.52583	-6.84524	942,3716,6774,7132,7297	CD86,JAK1,STAT3,TNFRSF1A,TYK2	5/47
2_Member	Canonical Pathways	M231	PID KIT PATHWAY	-9.29797	-6.65359	3717,5595,6198,6774,9402	JAK2,MAPK3,RPS6KB1,STAT3,GRAP2	5/52
2_Member	GO Biological Processes	GO:0060396	growth hormone receptor signaling pathway	-8.8396	-6.2671	3716,3717,6774,7297	JAK1,JAK2,STAT3,TYK2	4/20
2_Member	GO Biological Processes	GO:0071378	cellular response to growth hormone stimulus	-8.74805	-6.19004	3716,3717,6774,7297	JAK1,JAK2,STAT3,TYK2	4/21
2_Member	KEGG Pathway	hsa04217	Necroptosis	-8.62951	-6.0855	818,3716,3717,6774,7132,7297	CAMK2G,JAK1,JAK2,STAT3,TNFRSF1A,TYK2	6/159
2_Member	GO Biological Processes	GO:0071345	cellular response to cytokine stimulus	-8.57696	-6.04653	958,3716,3717,5594,5595,6198,6774,7132,7297	CD40,JAK1,JAK2,MAPK1,MAPK3,RPS6KB1,STAT3,TNFRSF1A,TYK2	9/737
2_Member	Reactome Gene Sets	R-HSA-6783589	Interleukin-6 family signaling	-8.49944	-5.9886	3716,3717,6774,7297	JAK1,JAK2,STAT3,TYK2	4/24
2_Member	Reactome Gene Sets	R-HSA-8854691	Interleukin-20 family signaling	-8.42395	-5.94268	3716,3717,6774,7297	JAK1,JAK2,STAT3,TYK2	4/25
2_Member	Reactome Gene Sets	R-HSA-9705462	Inactivation of CSF3 (G-CSF) signaling	-8.42395	-5.94268	3716,3717,6774,7297	JAK1,JAK2,STAT3,TYK2	4/25
2_Member	Canonical Pathways	M36	PID IL27 PATHWAY	-8.35162	-5.88334	3716,3717,6774,7297	JAK1,JAK2,STAT3,TYK2	4/26
2_Member	WikiPathways	WP3972	PDGFR beta pathway	-8.15127	-5.727	3716,3717,5595,6774	JAK1,JAK2,MAPK3,STAT3	4/29
2_Member	Reactome Gene Sets	R-HSA-9674555	Signaling by CSF3 (G-CSF)	-8.08935	-5.6805	3716,3717,6774,7297	JAK1,JAK2,STAT3,TYK2	4/30
2_Member	GO Biological Processes	GO:0060416	response to growth hormone	-7.91593	-5.54571	3716,3717,6774,7297	JAK1,JAK2,STAT3,TYK2	4/33
2_Member	GO Biological Processes	GO:0034341	response to type II interferon	-7.71924	-5.37236	958,3716,3717,6198,7297	CD40,JAK1,JAK2,RPS6KB1,TYK2	5/106
2_Member	Reactome Gene Sets	R-HSA-9020933	Interleukin-23 signaling	-7.43859	-5.13663	3717,6774,7297	JAK2,STAT3,TYK2	3/9
2_Member	Canonical Pathways	M183	PID IL6 7 PATHWAY	-7.27977	-5.0156	3716,3717,6774,7297	JAK1,JAK2,STAT3,TYK2	4/47
2_Member	GO Biological Processes	GO:0007259	cell surface receptor signaling pathway via JAK-STAT	-7.13423	-4.88465	3716,3717,6774,7297	JAK1,JAK2,STAT3,TYK2	4/51
2_Member	WikiPathways	WP585	Interferon type I signaling	-7.03265	-4.79989	3716,6198,6774,7297	JAK1,RPS6KB1,STAT3,TYK2	4/54
2_Member	GO Biological Processes	GO:0140105	interleukin-10-mediated signaling pathway	-7.02112	-4.79171	3716,6774,7297	JAK1,STAT3,TYK2	3/12
2_Member	GO Biological Processes	GO:0097696	cell surface receptor signaling pathway via STAT	-7.00009	-4.79028	3716,3717,6774,7297	JAK1,JAK2,STAT3,TYK2	4/55
2_Member	Reactome Gene Sets	R-HSA-447115	Interleukin-12 family signaling	-6.93676	-4.73643	3716,3717,6774,7297	JAK1,JAK2,STAT3,TYK2	4/57
2_Member	GO Biological Processes	GO:0060333	type II interferon-mediated signaling pathway	-6.9074	-4.71327	3716,3717,7297	JAK1,JAK2,TYK2	3/13
2_Member	GO Biological Processes	GO:0070102	interleukin-6-mediated signaling pathway	-6.80289	-4.61791	3716,3717,6774	JAK1,JAK2,STAT3	3/14
2_Member	Reactome Gene Sets	R-HSA-6788467	IL-6-type cytokine receptor ligand interactions	-6.53216	-4.38471	3716,3717,7297	JAK1,JAK2,TYK2	3/17
2_Member	WikiPathways	WP4337	ncRNAs involved in STAT3 signaling in hepatocellular carcinoma	-6.53216	-4.38471	3716,3717,6774	JAK1,JAK2,STAT3	3/17
2_Member	GO Biological Processes	GO:0019221	cytokine-mediated signaling pathway	-6.35086	-4.23023	3716,3717,5595,6774,7132,7297	JAK1,JAK2,MAPK3,STAT3,TNFRSF1A,TYK2	6/385
2_Member	KEGG Pathway	hsa05169	Epstein-Barr virus infection	-6.31032	-4.19486	958,3716,6774,7297,9020	CD40,JAK1,STAT3,TYK2,MAP3K14	5/203
2_Member	GO Biological Processes	GO:0071346	cellular response to type II interferon	-6.27507	-4.16725	3716,3717,6198,7297	JAK1,JAK2,RPS6KB1,TYK2	4/83
2_Member	WikiPathways	WP4197	Immune response to tuberculosis	-6.17828	-4.08778	3716,3717,7297	JAK1,JAK2,TYK2	3/22
2_Member	Reactome Gene Sets	R-HSA-9679191	Potential therapeutics for SARS	-5.9673	-3.90499	2908,3716,3717,7297	NR3C1,JAK1,JAK2,TYK2	4/99
2_Member	Reactome Gene Sets	R-HSA-6785807	Interleukin-4 and Interleukin-13 signaling	-5.81597	-3.77147	3716,3717,6774,7297	JAK1,JAK2,STAT3,TYK2	4/108
2_Member	GO Biological Processes	GO:0071354	cellular response to interleukin-6	-5.80461	-3.76661	3716,3717,6774	JAK1,JAK2,STAT3	3/29
2_Member	GO Biological Processes	GO:0070741	response to interleukin-6	-5.59151	-3.60419	3716,3717,6774	JAK1,JAK2,STAT3	3/34
2_Member	Canonical Pathways	M196	PID IL23 PATHWAY	-5.47876	-3.50498	3717,6774,7297	JAK2,STAT3,TYK2	3/37
2_Member	WikiPathways	WP4558	Interferon mediated signaling	-5.47876	-3.50498	3716,3717,7297	JAK1,JAK2,TYK2	3/37
2_Member	WikiPathways	WP4630	Measles virus infection	-5.41686	-3.45553	868,3716,6774,7297	CBLB,JAK1,STAT3,TYK2	4/136
2_Member	KEGG Pathway	hsa05162	Measles	-5.37923	-3.42327	868,3716,6774,7297	CBLB,JAK1,STAT3,TYK2	4/139
2_Member	WikiPathways	WP5474	Catabolism of skeletal muscle in cachexia	-5.3751	-3.42092	3716,6774,7132	JAK1,STAT3,TNFRSF1A	3/40
2_Member	Reactome Gene Sets	R-HSA-1433557	Signaling by SCF-KIT	-5.27918	-3.33029	3717,6774,9402	JAK2,STAT3,GRAP2	3/43
2_Member	Reactome Gene Sets	R-HSA-451927	Interleukin-2 family signaling	-5.24874	-3.30782	3716,3717,6774	JAK1,JAK2,STAT3	3/44
2_Member	Reactome Gene Sets	R-HSA-9020591	Interleukin-12 signaling	-5.16152	-3.23481	3716,3717,7297	JAK1,JAK2,TYK2	3/47
2_Member	KEGG Pathway	hsa04630	JAK-STAT signaling pathway	-5.05341	-3.14303	3716,3717,6774,7297	JAK1,JAK2,STAT3,TYK2	4/168
2_Member	Canonical Pathways	M50	PID PTP1B PATHWAY	-5.02817	-3.11939	3717,6774,7297	JAK2,STAT3,TYK2	3/52
2_Member	GO Biological Processes	GO:0009615	response to virus	-4.95169	-3.05239	958,3716,3717,7297,9020	CD40,JAK1,JAK2,TYK2,MAP3K14	5/385
2_Member	GO Biological Processes	GO:0140888	interferon-mediated signaling pathway	-4.84009	-2.95914	3716,3717,7297	JAK1,JAK2,TYK2	3/60
2_Member	Reactome Gene Sets	R-HSA-9679506	SARS-CoV Infections	-4.79981	-2.92942	2908,3716,3717,7297,7532	NR3C1,JAK1,JAK2,TYK2,YWHAG	5/414
2_Member	Canonical Pathways	M54	PID IL12 2PATHWAY	-4.7971	-2.92942	3717,6774,7297	JAK2,STAT3,TYK2	3/62
2_Member	Canonical Pathways	M28	PID IL4 2PATHWAY	-4.75551	-2.89503	3716,3717,6198	JAK1,JAK2,RPS6KB1	3/64
2_Member	GO Biological Processes	GO:0035710	CD4-positive, alpha-beta T cell activation	-4.67619	-2.82839	868,3716,6774	CBLB,JAK1,STAT3	3/68
2_Member	KEGG Pathway	hsa04920	Adipocytokine signaling pathway	-4.63832	-2.79876	3717,6774,7132	JAK2,STAT3,TNFRSF1A	3/70
2_Member	GO Biological Processes	GO:0002460	adaptive immune response based on somatic recombination of immune receptors built from immunoglobulin superfamily domains	-4.39013	-2.57954	958,3716,4208,6774	CD40,JAK1,MEF2C,STAT3	4/248
2_Member	GO Biological Processes	GO:0098586	cellular response to virus	-4.34033	-2.53606	3716,3717,7297	JAK1,JAK2,TYK2	3/88
2_Member	GO Biological Processes	GO:1900182	positive regulation of protein localization to nucleus	-4.26864	-2.47307	3716,3717,7297	JAK1,JAK2,TYK2	3/93
2_Member	GO Biological Processes	GO:0046631	alpha-beta T cell activation	-4.08723	-2.32252	868,3716,6774	CBLB,JAK1,STAT3	3/107
2_Member	GO Biological Processes	GO:1903557	positive regulation of tumor necrosis factor superfamily cytokine production	-4.00549	-2.25763	942,3717,6774	CD86,JAK2,STAT3	3/114
2_Member	GO Biological Processes	GO:0042110	T cell activation	-3.95106	-2.21624	868,942,3716,6774	CBLB,CD86,JAK1,STAT3	4/322
2_Member	GO Biological Processes	GO:1900180	regulation of protein localization to nucleus	-3.71438	-2.00146	3716,3717,7297	JAK1,JAK2,TYK2	3/143
2_Member	GO Biological Processes	GO:0045087	innate immune response	-3.55234	-1.86027	958,3716,3717,6198,7297	CD40,JAK1,JAK2,RPS6KB1,TYK2	5/761
2_Member	GO Biological Processes	GO:0045766	positive regulation of angiogenesis	-3.36585	-1.69274	958,3716,6774	CD40,JAK1,STAT3	3/188
2_Member	GO Biological Processes	GO:1904018	positive regulation of vasculature development	-3.34579	-1.67638	958,3716,6774	CD40,JAK1,STAT3	3/191
2_Member	GO Biological Processes	GO:1903555	regulation of tumor necrosis factor superfamily cytokine production	-3.31954	-1.65197	942,3717,6774	CD86,JAK2,STAT3	3/195
2_Member	Reactome Gene Sets	R-HSA-9705683	SARS-CoV-2-host interactions	-3.26869	-1.60568	3716,7297,7532	JAK1,TYK2,YWHAG	3/203
2_Member	KEGG Pathway	hsa05168	Herpes simplex virus 1 infection	-3.1546	-1.49788	3716,3717,7132,7297	JAK1,JAK2,TNFRSF1A,TYK2	4/522
2_Member	GO Biological Processes	GO:0006351	DNA-templated transcription	-3.0818	-1.42776	3717,5595,6774,7132	JAK2,MAPK3,STAT3,TNFRSF1A	4/546
2_Member	WikiPathways	WP5115	Network map of SARS CoV 2 signaling	-2.98686	-1.34248	3716,3717,10666	JAK1,JAK2,CD226	3/254
2_Member	GO Biological Processes	GO:0045165	cell fate commitment	-2.97218	-1.32953	3716,4208,6774	JAK1,MEF2C,STAT3	3/257
2_Member	Reactome Gene Sets	R-HSA-9694516	SARS-CoV-2 Infection	-2.7837	-1.15635	3716,7297,7532	JAK1,TYK2,YWHAG	3/299
2_Member	GO Biological Processes	GO:0045765	regulation of angiogenesis	-2.56504	-0.945141	958,3716,6774	CD40,JAK1,STAT3	3/357
2_Member	GO Biological Processes	GO:1901342	regulation of vasculature development	-2.53453	-0.916274	958,3716,6774	CD40,JAK1,STAT3	3/366
2_Member	GO Biological Processes	GO:0045936	negative regulation of phosphate metabolic process	-2.50482	-0.888193	868,6774,7532	CBLB,STAT3,YWHAG	3/375
2_Member	GO Biological Processes	GO:0010563	negative regulation of phosphorus metabolic process	-2.50156	-0.885753	868,6774,7532	CBLB,STAT3,YWHAG	3/376
2_Member	GO Biological Processes	GO:0006366	transcription by RNA polymerase II	-2.39909	-0.786522	3717,6774,7132	JAK2,STAT3,TNFRSF1A	3/409
2_Member	GO Biological Processes	GO:0050727	regulation of inflammatory response	-2.33001	-0.722259	3717,6774,7132	JAK2,STAT3,TNFRSF1A	3/433
2_Member	GO Biological Processes	GO:0002252	immune effector process	-2.24927	-0.643909	958,3716,6774	CD40,JAK1,STAT3	3/463
2_Member	GO Biological Processes	GO:1903829	positive regulation of protein localization	-2.1936	-0.589031	3716,3717,7297	JAK1,JAK2,TYK2	3/485
2_Member	GO Biological Processes	GO:0006886	intracellular protein transport	-2.02695	-0.427892	868,1315,6774	CBLB,COPB1,STAT3	3/558
3_Summary	WikiPathways	WP437	EGF EGFR signaling	-12.4862	-9.14281	868,3716,3717,4208,5594,6198,6774,50807,5595,7148,2908	CBLB,JAK1,JAK2,MEF2C,MAPK1,RPS6KB1,STAT3,ASAP1,MAPK3,TNXB,NR3C1	11/-
3_Member	WikiPathways	WP437	EGF EGFR signaling	-12.4862	-9.14281	868,3716,3717,4208,5594,6198,6774,50807	CBLB,JAK1,JAK2,MEF2C,MAPK1,RPS6KB1,STAT3,ASAP1	8/159
3_Member	WikiPathways	WP3888	VEGFA VEGFR2 signaling	-6.05933	-3.99013	4208,5594,5595,6198,6774,7148	MEF2C,MAPK1,MAPK3,RPS6KB1,STAT3,TNXB	6/432
3_Member	GO Biological Processes	GO:0070848	response to growth factor	-5.58364	-3.59823	2908,4208,5594,5595,6198,6774	NR3C1,MEF2C,MAPK1,MAPK3,RPS6KB1,STAT3	6/522
3_Member	GO Biological Processes	GO:0071363	cellular response to growth factor stimulus	-4.44952	-2.63638	2908,4208,5595,6198,6774	NR3C1,MEF2C,MAPK3,RPS6KB1,STAT3	5/490
3_Member	GO Biological Processes	GO:0007610	behavior	-3.97294	-2.23274	2908,4208,5594,6198,6774	NR3C1,MEF2C,MAPK1,RPS6KB1,STAT3	5/618
3_Member	GO Biological Processes	GO:0048660	regulation of smooth muscle cell proliferation	-3.47141	-1.78987	3717,4208,6198	JAK2,MEF2C,RPS6KB1	3/173
3_Member	GO Biological Processes	GO:0007611	learning or memory	-2.87867	-1.24374	4208,5594,6198	MEF2C,MAPK1,RPS6KB1	3/277
3_Member	GO Biological Processes	GO:0048638	regulation of developmental growth	-2.70744	-1.08259	4208,6198,6774	MEF2C,RPS6KB1,STAT3	3/318
3_Member	GO Biological Processes	GO:0050890	cognition	-2.69584	-1.07348	4208,5594,6198	MEF2C,MAPK1,RPS6KB1	3/321
4_Summary	GO Biological Processes	GO:0070663	regulation of leukocyte proliferation	-10.6369	-7.67376	868,942,958,3717,4208,5594,5595,7297,2908,6198,10666,7132,3716,6774,7532,9402,50488	CBLB,CD86,CD40,JAK2,MEF2C,MAPK1,MAPK3,TYK2,NR3C1,RPS6KB1,CD226,TNFRSF1A,JAK1,STAT3,YWHAG,GRAP2,MINK1	17/-
4_Member	GO Biological Processes	GO:0070663	regulation of leukocyte proliferation	-10.6369	-7.67376	868,942,958,3717,4208,5594,5595,7297	CBLB,CD86,CD40,JAK2,MEF2C,MAPK1,MAPK3,TYK2	8/270
4_Member	GO Biological Processes	GO:0070665	positive regulation of leukocyte proliferation	-10.4016	-7.52069	942,958,3717,4208,5594,5595,7297	CD86,CD40,JAK2,MEF2C,MAPK1,MAPK3,TYK2	7/165
4_Member	GO Biological Processes	GO:0071396	cellular response to lipid	-8.28652	-5.8342	942,958,2908,3717,4208,5594,5595,6198	CD86,CD40,NR3C1,JAK2,MEF2C,MAPK1,MAPK3,RPS6KB1	8/536
4_Member	GO Biological Processes	GO:0032496	response to lipopolysaccharide	-8.27446	-5.8342	942,958,3717,4208,5594,5595,6198	CD86,CD40,JAK2,MEF2C,MAPK1,MAPK3,RPS6KB1	7/333
4_Member	GO Biological Processes	GO:0002237	response to molecule of bacterial origin	-8.0914	-5.6805	942,958,3717,4208,5594,5595,6198	CD86,CD40,JAK2,MEF2C,MAPK1,MAPK3,RPS6KB1	7/354
4_Member	GO Biological Processes	GO:0071222	cellular response to lipopolysaccharide	-7.93053	-5.55096	942,958,3717,4208,5594,5595	CD86,CD40,JAK2,MEF2C,MAPK1,MAPK3	6/208
4_Member	GO Biological Processes	GO:0071219	cellular response to molecule of bacterial origin	-7.77356	-5.40793	942,958,3717,4208,5594,5595	CD86,CD40,JAK2,MEF2C,MAPK1,MAPK3	6/221
4_Member	GO Biological Processes	GO:0050670	regulation of lymphocyte proliferation	-7.56049	-5.23833	868,942,958,3717,4208,7297	CBLB,CD86,CD40,JAK2,MEF2C,TYK2	6/240
4_Member	GO Biological Processes	GO:0050778	positive regulation of immune response	-7.53936	-5.22132	868,942,958,3717,4208,5594,7297,10666	CBLB,CD86,CD40,JAK2,MEF2C,MAPK1,TYK2,CD226	8/669
4_Member	GO Biological Processes	GO:0032944	regulation of mononuclear cell proliferation	-7.50731	-5.19334	868,942,958,3717,4208,7297	CBLB,CD86,CD40,JAK2,MEF2C,TYK2	6/245
4_Member	GO Biological Processes	GO:0071216	cellular response to biotic stimulus	-7.48635	-5.17642	942,958,3717,4208,5594,5595	CD86,CD40,JAK2,MEF2C,MAPK1,MAPK3	6/247
4_Member	GO Biological Processes	GO:0009617	response to bacterium	-7.32603	-5.03576	942,958,3717,4208,5594,5595,6198,7132	CD86,CD40,JAK2,MEF2C,MAPK1,MAPK3,RPS6KB1,TNFRSF1A	8/713
4_Member	GO Biological Processes	GO:0050671	positive regulation of lymphocyte proliferation	-7.0515	-4.81537	942,958,3717,4208,7297	CD86,CD40,JAK2,MEF2C,TYK2	5/144
4_Member	GO Biological Processes	GO:0032946	positive regulation of mononuclear cell proliferation	-7.00678	-4.79028	942,958,3717,4208,7297	CD86,CD40,JAK2,MEF2C,TYK2	5/147
4_Member	GO Biological Processes	GO:0002694	regulation of leukocyte activation	-6.62387	-4.45949	868,942,958,3717,4208,7297,10666	CBLB,CD86,CD40,JAK2,MEF2C,TYK2,CD226	7/581
4_Member	GO Biological Processes	GO:0045321	leukocyte activation	-6.5102	-4.36551	868,942,958,3716,3717,4208,6774	CBLB,CD86,CD40,JAK1,JAK2,MEF2C,STAT3	7/604
4_Member	GO Biological Processes	GO:0002696	positive regulation of leukocyte activation	-6.4794	-4.33745	942,958,3717,4208,7297,10666	CD86,CD40,JAK2,MEF2C,TYK2,CD226	6/366
4_Member	GO Biological Processes	GO:0051338	regulation of transferase activity	-6.41968	-4.28584	868,942,958,3717,5594,5595,7532	CBLB,CD86,CD40,JAK2,MAPK1,MAPK3,YWHAG	7/623
4_Member	GO Biological Processes	GO:0002822	regulation of adaptive immune response based on somatic recombination of immune receptors built from immunoglobulin superfamily domains	-6.36389	-4.23802	958,3717,4208,7297,10666	CD40,JAK2,MEF2C,TYK2,CD226	5/198
4_Member	GO Biological Processes	GO:0050867	positive regulation of cell activation	-6.35086	-4.23023	942,958,3717,4208,7297,10666	CD86,CD40,JAK2,MEF2C,TYK2,CD226	6/385
4_Member	GO Biological Processes	GO:0050865	regulation of cell activation	-6.34567	-4.22763	868,942,958,3717,4208,7297,10666	CBLB,CD86,CD40,JAK2,MEF2C,TYK2,CD226	7/639
4_Member	GO Biological Processes	GO:0043408	regulation of MAPK cascade	-6.24704	-4.14424	958,3717,4208,5594,5595,9402,50488	CD40,JAK2,MEF2C,MAPK1,MAPK3,GRAP2,MINK1	7/661
4_Member	GO Biological Processes	GO:0002819	regulation of adaptive immune response	-6.20716	-4.10932	958,3717,4208,7297,10666	CD40,JAK2,MEF2C,TYK2,CD226	5/213
4_Member	GO Biological Processes	GO:0001775	cell activation	-5.9588	-3.89875	868,942,958,3716,3717,4208,6774	CBLB,CD86,CD40,JAK1,JAK2,MEF2C,STAT3	7/730
4_Member	GO Biological Processes	GO:0046649	lymphocyte activation	-5.78872	-3.75501	868,942,958,3716,4208,6774	CBLB,CD86,CD40,JAK1,MEF2C,STAT3	6/481
4_Member	WikiPathways	WP453	Inflammatory response pathway	-5.75908	-3.72748	942,958,7132	CD86,CD40,TNFRSF1A	3/30
4_Member	GO Biological Processes	GO:0046634	regulation of alpha-beta T cell activation	-5.67709	-3.66356	868,942,3717,7297	CBLB,CD86,JAK2,TYK2	4/117
4_Member	GO Biological Processes	GO:0022407	regulation of cell-cell adhesion	-5.67649	-3.66356	868,942,3716,3717,7297,50488	CBLB,CD86,JAK1,JAK2,TYK2,MINK1	6/503
4_Member	GO Biological Processes	GO:0001819	positive regulation of cytokine production	-5.66655	-3.65765	942,958,3717,6774,7297,10666	CD86,CD40,JAK2,STAT3,TYK2,CD226	6/505
4_Member	GO Biological Processes	GO:0051249	regulation of lymphocyte activation	-5.63206	-3.63048	868,942,958,3717,4208,7297	CBLB,CD86,CD40,JAK2,MEF2C,TYK2	6/512
4_Member	GO Biological Processes	GO:0002824	positive regulation of adaptive immune response based on somatic recombination of immune receptors built from immunoglobulin superfamily domains	-5.52156	-3.54183	958,3717,7297,10666	CD40,JAK2,TYK2,CD226	4/128
4_Member	GO Biological Processes	GO:0002821	positive regulation of adaptive immune response	-5.44243	-3.47748	958,3717,7297,10666	CD40,JAK2,TYK2,CD226	4/134
4_Member	GO Biological Processes	GO:0046640	regulation of alpha-beta T cell proliferation	-5.27918	-3.33029	868,3717,7297	CBLB,JAK2,TYK2	3/43
4_Member	GO Biological Processes	GO:0051251	positive regulation of lymphocyte activation	-5.26305	-3.3159	942,958,3717,4208,7297	CD86,CD40,JAK2,MEF2C,TYK2	5/332
4_Member	WikiPathways	WP5078	T cell modulation in pancreatic cancer	-5.18994	-3.25821	942,958,10666	CD86,CD40,CD226	3/46
4_Member	GO Biological Processes	GO:0051347	positive regulation of transferase activity	-5.06936	-3.15576	942,958,3717,5594,5595	CD86,CD40,JAK2,MAPK1,MAPK3	5/364
4_Member	GO Biological Processes	GO:0002250	adaptive immune response	-5.02314	-3.11595	942,958,3716,3717,4208,6774	CD86,CD40,JAK1,JAK2,MEF2C,STAT3	6/654
4_Member	GO Biological Processes	GO:0042129	regulation of T cell proliferation	-4.907	-3.01235	868,942,3717,7297	CBLB,CD86,JAK2,TYK2	4/183
4_Member	GO Biological Processes	GO:0010562	positive regulation of phosphorus metabolic process	-4.88036	-2.98917	942,958,3717,4208,5594,7132	CD86,CD40,JAK2,MEF2C,MAPK1,TNFRSF1A	6/693
4_Member	GO Biological Processes	GO:0045937	positive regulation of phosphate metabolic process	-4.88036	-2.98917	942,958,3717,4208,5594,7132	CD86,CD40,JAK2,MEF2C,MAPK1,TNFRSF1A	6/693
4_Member	GO Biological Processes	GO:0031401	positive regulation of protein modification process	-4.67018	-2.82376	868,942,958,3717,5594,7132	CBLB,CD86,CD40,JAK2,MAPK1,TNFRSF1A	6/755
4_Member	GO Biological Processes	GO:0045859	regulation of protein kinase activity	-4.60315	-2.77078	868,942,958,3717,7532	CBLB,CD86,CD40,JAK2,YWHAG	5/455
4_Member	GO Biological Processes	GO:0046635	positive regulation of alpha-beta T cell activation	-4.56579	-2.73963	942,3717,7297	CD86,JAK2,TYK2	3/74
4_Member	GO Biological Processes	GO:0043410	positive regulation of MAPK cascade	-4.54911	-2.72559	958,3717,4208,5595,50488	CD40,JAK2,MEF2C,MAPK3,MINK1	5/467
4_Member	GO Biological Processes	GO:0032729	positive regulation of type II interferon production	-4.49718	-2.67887	3717,7297,10666	JAK2,TYK2,CD226	3/78
4_Member	GO Biological Processes	GO:0043549	regulation of kinase activity	-4.33875	-2.53573	868,942,958,3717,7532	CBLB,CD86,CD40,JAK2,YWHAG	5/517
4_Member	GO Biological Processes	GO:0001934	positive regulation of protein phosphorylation	-4.14174	-2.36542	942,958,3717,5594,7132	CD86,CD40,JAK2,MAPK1,TNFRSF1A	5/569
4_Member	GO Biological Processes	GO:0042102	positive regulation of T cell proliferation	-4.12396	-2.35349	942,3717,7297	CD86,JAK2,TYK2	3/104
4_Member	GO Biological Processes	GO:0042327	positive regulation of phosphorylation	-3.98618	-2.24271	942,958,3717,5594,7132	CD86,CD40,JAK2,MAPK1,TNFRSF1A	5/614
4_Member	GO Biological Processes	GO:0032649	regulation of type II interferon production	-3.92875	-2.19819	3717,7297,10666	JAK2,TYK2,CD226	3/121
4_Member	GO Biological Processes	GO:0022409	positive regulation of cell-cell adhesion	-3.91006	-2.18161	942,3716,3717,7297	CD86,JAK1,JAK2,TYK2	4/330
4_Member	GO Biological Processes	GO:0002702	positive regulation of production of molecular mediator of immune response	-3.78813	-2.07112	942,958,10666	CD86,CD40,CD226	3/135
4_Member	GO Biological Processes	GO:0050863	regulation of T cell activation	-3.63666	-1.93379	868,942,3717,7297	CBLB,CD86,JAK2,TYK2	4/389
4_Member	GO Biological Processes	GO:1903037	regulation of leukocyte cell-cell adhesion	-3.63666	-1.93379	868,942,3717,7297	CBLB,CD86,JAK2,TYK2	4/389
4_Member	KEGG Pathway	hsa04514	Cell adhesion molecules	-3.59502	-1.89709	942,958,10666	CD86,CD40,CD226	3/157
4_Member	GO Biological Processes	GO:0008285	negative regulation of cell population proliferation	-3.47503	-1.79255	868,942,3717,4208,6774	CBLB,CD86,JAK2,MEF2C,STAT3	5/791
4_Member	GO Biological Processes	GO:0051345	positive regulation of hydrolase activity	-3.46753	-1.78788	958,3717,4208,6774	CD40,JAK2,MEF2C,STAT3	4/431
4_Member	GO Biological Processes	GO:0042113	B cell activation	-3.35912	-1.68787	942,958,4208	CD86,CD40,MEF2C	3/189
4_Member	GO Biological Processes	GO:0002700	regulation of production of molecular mediator of immune response	-3.35244	-1.68211	942,958,10666	CD86,CD40,CD226	3/190
4_Member	KEGG Pathway	hsa05202	Transcriptional misregulation in cancer	-3.33259	-1.6641	942,958,4208	CD86,CD40,MEF2C	3/193
4_Member	GO Biological Processes	GO:0045785	positive regulation of cell adhesion	-3.2608	-1.5987	942,3716,3717,7297	CD86,JAK1,JAK2,TYK2	4/489
4_Member	GO Biological Processes	GO:0022408	negative regulation of cell-cell adhesion	-3.25016	-1.58986	868,942,3717	CBLB,CD86,JAK2	3/206
4_Member	GO Biological Processes	GO:0045860	positive regulation of protein kinase activity	-3.02692	-1.37642	942,958,3717	CD86,CD40,JAK2	3/246
4_Member	GO Biological Processes	GO:0050870	positive regulation of T cell activation	-2.97218	-1.32953	942,3717,7297	CD86,JAK2,TYK2	3/257
4_Member	GO Biological Processes	GO:0002699	positive regulation of immune effector process	-2.94334	-1.30328	942,958,10666	CD86,CD40,CD226	3/263
4_Member	GO Biological Processes	GO:1903039	positive regulation of leukocyte cell-cell adhesion	-2.86082	-1.22844	942,3717,7297	CD86,JAK2,TYK2	3/281
4_Member	GO Biological Processes	GO:0033674	positive regulation of kinase activity	-2.81309	-1.18155	942,958,3717	CD86,CD40,JAK2	3/292
4_Member	GO Biological Processes	GO:0007162	negative regulation of cell adhesion	-2.73099	-1.10448	868,942,3717	CBLB,CD86,JAK2	3/312
4_Member	GO Biological Processes	GO:0051336	regulation of hydrolase activity	-2.70955	-1.08387	958,3717,4208,6774	CD40,JAK2,MEF2C,STAT3	4/689
4_Member	GO Biological Processes	GO:0002697	regulation of immune effector process	-2.43836	-0.824983	942,958,10666	CD86,CD40,CD226	3/396
4_Member	GO Biological Processes	GO:1903706	regulation of hemopoiesis	-2.34688	-0.738335	942,4208,6774	CD86,MEF2C,STAT3	3/427
5_Summary	GO Biological Processes	GO:0071260	cellular response to mechanical stimulus	-6.47633	-4.3371	958,5595,7132,9020,6198,3717,868,2908,4208,6774	CD40,MAPK3,TNFRSF1A,MAP3K14,RPS6KB1,JAK2,CBLB,NR3C1,MEF2C,STAT3	10/-
5_Member	GO Biological Processes	GO:0071260	cellular response to mechanical stimulus	-6.47633	-4.3371	958,5595,7132,9020	CD40,MAPK3,TNFRSF1A,MAP3K14	4/74
5_Member	GO Biological Processes	GO:0071496	cellular response to external stimulus	-6.45276	-4.31623	958,5595,7132,9020	CD40,MAPK3,TNFRSF1A,MAP3K14	4/75
5_Member	GO Biological Processes	GO:0009612	response to mechanical stimulus	-6.13788	-4.05698	958,5595,6198,7132,9020	CD40,MAPK3,RPS6KB1,TNFRSF1A,MAP3K14	5/220
5_Member	GO Biological Processes	GO:0042531	positive regulation of tyrosine phosphorylation of STAT protein	-4.71523	-2.85902	958,3717,7132	CD40,JAK2,TNFRSF1A	3/66
5_Member	GO Biological Processes	GO:0050730	regulation of peptidyl-tyrosine phosphorylation	-4.6165	-2.77966	868,958,3717,7132	CBLB,CD40,JAK2,TNFRSF1A	4/217
5_Member	GO Biological Processes	GO:0042509	regulation of tyrosine phosphorylation of STAT protein	-4.53102	-2.71011	958,3717,7132	CD40,JAK2,TNFRSF1A	3/76
5_Member	GO Biological Processes	GO:0043065	positive regulation of apoptotic process	-4.20396	-2.41691	958,2908,3717,4208,7132	CD40,NR3C1,JAK2,MEF2C,TNFRSF1A	5/552
5_Member	Reactome Gene Sets	R-HSA-5668541	TNFR2 non-canonical NF-kB pathway	-4.14906	-2.37156	958,7132,9020	CD40,TNFRSF1A,MAP3K14	3/102
5_Member	GO Biological Processes	GO:0043068	positive regulation of programmed cell death	-4.13455	-2.36174	958,2908,3717,4208,7132	CD40,NR3C1,JAK2,MEF2C,TNFRSF1A	5/571
5_Member	KEGG Pathway	hsa04064	NF-kappa B signaling pathway	-4.1116	-2.34228	958,7132,9020	CD40,TNFRSF1A,MAP3K14	3/105
5_Member	GO Biological Processes	GO:0006954	inflammatory response	-4.10606	-2.3379	958,2908,3717,6774,7132	CD40,NR3C1,JAK2,STAT3,TNFRSF1A	5/579
5_Member	GO Biological Processes	GO:0071214	cellular response to abiotic stimulus	-3.96147	-2.22517	958,5595,7132,9020	CD40,MAPK3,TNFRSF1A,MAP3K14	4/320
5_Member	GO Biological Processes	GO:0104004	cellular response to environmental stimulus	-3.96147	-2.22517	958,5595,7132,9020	CD40,MAPK3,TNFRSF1A,MAP3K14	4/320
5_Member	GO Biological Processes	GO:0050731	positive regulation of peptidyl-tyrosine phosphorylation	-3.58692	-1.89095	958,3717,7132	CD40,JAK2,TNFRSF1A	3/158
5_Member	GO Biological Processes	GO:1903530	regulation of secretion by cell	-2.03758	-0.437736	3717,4208,7132	JAK2,MEF2C,TNFRSF1A	3/553
6_Summary	GO Biological Processes	GO:0071549	cellular response to dexamethasone stimulus	-5.85181	-3.80512	2908,3717,6198,3716,4208,5594,6774,5595,818	NR3C1,JAK2,RPS6KB1,JAK1,MEF2C,MAPK1,STAT3,MAPK3,CAMK2G	9/-
6_Member	GO Biological Processes	GO:0071549	cellular response to dexamethasone stimulus	-5.85181	-3.80512	2908,3717,6198	NR3C1,JAK2,RPS6KB1	3/28
6_Member	GO Biological Processes	GO:0046677	response to antibiotic	-5.47876	-3.50498	3716,3717,4208	JAK1,JAK2,MEF2C	3/37
6_Member	GO Biological Processes	GO:0071548	response to dexamethasone	-5.219	-3.28049	2908,3717,6198	NR3C1,JAK2,RPS6KB1	3/45
6_Member	GO Biological Processes	GO:0071383	cellular response to steroid hormone stimulus	-5.20279	-3.26768	2908,3717,5594,6198	NR3C1,JAK2,MAPK1,RPS6KB1	4/154
6_Member	GO Biological Processes	GO:0071385	cellular response to glucocorticoid stimulus	-4.95436	-3.05349	2908,3717,6198	NR3C1,JAK2,RPS6KB1	3/55
6_Member	GO Biological Processes	GO:0030522	intracellular receptor signaling pathway	-4.8792	-2.98917	2908,3717,5594,6774	NR3C1,JAK2,MAPK1,STAT3	4/186
6_Member	GO Biological Processes	GO:0061180	mammary gland epithelium development	-4.86214	-2.97667	2908,3717,5594	NR3C1,JAK2,MAPK1	3/59
6_Member	GO Biological Processes	GO:0030518	nuclear receptor-mediated steroid hormone signaling pathway	-4.7971	-2.92942	2908,3717,5594	NR3C1,JAK2,MAPK1	3/62
6_Member	GO Biological Processes	GO:0071384	cellular response to corticosteroid stimulus	-4.73521	-2.87758	2908,3717,6198	NR3C1,JAK2,RPS6KB1	3/65
6_Member	GO Biological Processes	GO:0071407	cellular response to organic cyclic compound	-4.54911	-2.72559	2908,3717,4208,5594,6198	NR3C1,JAK2,MEF2C,MAPK1,RPS6KB1	5/467
6_Member	GO Biological Processes	GO:0043401	steroid hormone receptor signaling pathway	-4.49718	-2.67887	2908,3717,5594	NR3C1,JAK2,MAPK1	3/78
6_Member	GO Biological Processes	GO:0141193	nuclear receptor-mediated signaling pathway	-4.35517	-2.54838	2908,3717,5594	NR3C1,JAK2,MAPK1	3/87
6_Member	GO Biological Processes	GO:0048545	response to steroid hormone	-4.14978	-2.37156	2908,3717,5594,6198	NR3C1,JAK2,MAPK1,RPS6KB1	4/286
6_Member	GO Biological Processes	GO:1901655	cellular response to ketone	-4.08723	-2.32252	2908,3717,6198	NR3C1,JAK2,RPS6KB1	3/107
6_Member	GO Biological Processes	GO:0030879	mammary gland development	-3.86653	-2.14228	2908,3717,5594	NR3C1,JAK2,MAPK1	3/127
6_Member	WikiPathways	WP236	Adipogenesis	-3.82672	-2.10558	2908,4208,6774	NR3C1,MEF2C,STAT3	3/131
6_Member	GO Biological Processes	GO:0051384	response to glucocorticoid	-3.77867	-2.06268	2908,3717,6198	NR3C1,JAK2,RPS6KB1	3/136
6_Member	GO Biological Processes	GO:0030097	hemopoiesis	-3.75817	-2.04321	2908,3716,3717,4208,6774	NR3C1,JAK1,JAK2,MEF2C,STAT3	5/687
6_Member	GO Biological Processes	GO:0009755	hormone-mediated signaling pathway	-3.72336	-2.00942	2908,3717,5594	NR3C1,JAK2,MAPK1	3/142
6_Member	GO Biological Processes	GO:0031960	response to corticosteroid	-3.58692	-1.89095	2908,3717,6198	NR3C1,JAK2,RPS6KB1	3/158
6_Member	GO Biological Processes	GO:0071560	cellular response to transforming growth factor beta stimulus	-3.56293	-1.86989	2908,4208,6774	NR3C1,MEF2C,STAT3	3/161
6_Member	GO Biological Processes	GO:0071559	response to transforming growth factor beta	-3.50872	-1.82147	2908,4208,6774	NR3C1,MEF2C,STAT3	3/168
6_Member	GO Biological Processes	GO:0048732	gland development	-3.4906	-1.80621	2908,3717,5594,5595	NR3C1,JAK2,MAPK1,MAPK3	4/425
6_Member	GO Biological Processes	GO:1901654	response to ketone	-3.17298	-1.51447	2908,3717,6198	NR3C1,JAK2,RPS6KB1	3/219
6_Member	GO Biological Processes	GO:0043523	regulation of neuron apoptotic process	-3.03203	-1.38064	2908,3717,4208	NR3C1,JAK2,MEF2C	3/245
6_Member	GO Biological Processes	GO:0030099	myeloid cell differentiation	-2.7962	-1.16718	2908,3717,4208	NR3C1,JAK2,MEF2C	3/296
6_Member	GO Biological Processes	GO:1903131	mononuclear cell differentiation	-2.54461	-0.925534	2908,3716,6774	NR3C1,JAK1,STAT3	3/363
6_Member	GO Biological Processes	GO:0002521	leukocyte differentiation	-2.35257	-0.742414	2908,3716,6774	NR3C1,JAK1,STAT3	3/425
6_Member	GO Biological Processes	GO:0010817	regulation of hormone levels	-2.06352	-0.462896	818,2908,3717	CAMK2G,NR3C1,JAK2	3/541
7_Summary	Canonical Pathways	M45	PID CD40 PATHWAY	-5.7151	-3.68981	868,958,9020,942,9402,10666	CBLB,CD40,MAP3K14,CD86,GRAP2,CD226	6/-
7_Member	Canonical Pathways	M45	PID CD40 PATHWAY	-5.7151	-3.68981	868,958,9020	CBLB,CD40,MAP3K14	3/31
7_Member	Reactome Gene Sets	R-HSA-389356	CD28 co-stimulation	-5.6314	-3.63048	942,9020,9402	CD86,MAP3K14,GRAP2	3/33
7_Member	KEGG Pathway	hsa04672	Intestinal immune network for IgA production	-5.1065	-3.18803	942,958,9020	CD86,CD40,MAP3K14	3/49
7_Member	Canonical Pathways	M88	PID CD8 TCR PATHWAY	-5.00309	-3.09749	942,9020,9402	CD86,MAP3K14,GRAP2	3/53
7_Member	WikiPathways	WP5072	Modulators of TCR signaling and T cell activation	-4.81841	-2.94193	868,9020,9402	CBLB,MAP3K14,GRAP2	3/61
7_Member	Canonical Pathways	M34	PID TCR PATHWAY	-4.75551	-2.89503	942,9020,9402	CD86,MAP3K14,GRAP2	3/64
7_Member	Reactome Gene Sets	R-HSA-388841	Costimulation by the CD28 family	-4.65711	-2.81208	942,9020,9402	CD86,MAP3K14,GRAP2	3/69
7_Member	Reactome Gene Sets	R-HSA-1280218	Adaptive Immune System	-4.62846	-2.79026	868,942,958,9020,9402,10666	CBLB,CD86,CD40,MAP3K14,GRAP2,CD226	6/768
8_Summary	GO Biological Processes	GO:0043502	regulation of muscle adaptation	-4.22751	-2.43316	818,6198,7132,6774	CAMK2G,RPS6KB1,TNFRSF1A,STAT3	4/-
8_Member	GO Biological Processes	GO:0043502	regulation of muscle adaptation	-4.22751	-2.43316	818,6198,7132	CAMK2G,RPS6KB1,TNFRSF1A	3/96
8_Member	KEGG Pathway	hsa04931	Insulin resistance	-4.06333	-2.30318	6198,6774,7132	RPS6KB1,STAT3,TNFRSF1A	3/109
8_Member	GO Biological Processes	GO:0090257	regulation of muscle system process	-2.99675	-1.3515	818,6198,7132	CAMK2G,RPS6KB1,TNFRSF1A	3/252
9_Summary	GO Biological Processes	GO:0010469	regulation of signaling receptor activity	-4.20081	-2.41617	868,3717,50488,5595,7148,9749	CBLB,JAK2,MINK1,MAPK3,TNXB,PHACTR2	6/-
9_Member	GO Biological Processes	GO:0010469	regulation of signaling receptor activity	-4.20081	-2.41617	868,3717,50488	CBLB,JAK2,MINK1	3/98
9_Member	GO Biological Processes	GO:0046777	protein autophosphorylation	-3.61138	-1.91247	3717,5595,50488	JAK2,MAPK3,MINK1	3/155
9_Member	GO Biological Processes	GO:0030036	actin cytoskeleton organization	-3.06414	-1.41099	3717,7148,9749,50488	JAK2,TNXB,PHACTR2,MINK1	4/552
9_Member	GO Biological Processes	GO:0030029	actin filament-based process	-2.87485	-1.24077	3717,7148,9749,50488	JAK2,TNXB,PHACTR2,MINK1	4/621
10_Summary	GO Biological Processes	GO:0002768	immune response-regulating cell surface receptor signaling pathway	-4.16751	-2.38645	868,958,4208,5594,6774,2908,7532,50488,50807	CBLB,CD40,MEF2C,MAPK1,STAT3,NR3C1,YWHAG,MINK1,ASAP1	9/-
10_Member	GO Biological Processes	GO:0002768	immune response-regulating cell surface receptor signaling pathway	-4.16751	-2.38645	868,958,4208,5594	CBLB,CD40,MEF2C,MAPK1	4/283
10_Member	GO Biological Processes	GO:0046651	lymphocyte proliferation	-3.85646	-2.13429	868,958,4208	CBLB,CD40,MEF2C	3/128
10_Member	GO Biological Processes	GO:0032943	mononuclear cell proliferation	-3.81696	-2.09686	868,958,4208	CBLB,CD40,MEF2C	3/132
10_Member	GO Biological Processes	GO:0008283	cell population proliferation	-3.66634	-1.95646	868,958,4208,5594,6774	CBLB,CD40,MEF2C,MAPK1,STAT3	5/719
10_Member	GO Biological Processes	GO:0002764	immune response-regulating signaling pathway	-3.64519	-1.93991	868,958,4208,5594	CBLB,CD40,MEF2C,MAPK1	4/387
10_Member	GO Biological Processes	GO:0070661	leukocyte proliferation	-3.64477	-1.93991	868,958,4208	CBLB,CD40,MEF2C	3/151
10_Member	GO Biological Processes	GO:0050851	antigen receptor-mediated signaling pathway	-3.57887	-1.88388	868,4208,5594	CBLB,MEF2C,MAPK1	3/159
10_Member	WikiPathways	WP706	Sudden infant death syndrome SIDS susceptibility pathways	-3.57088	-1.87686	2908,4208,7532	NR3C1,MEF2C,YWHAG	3/160
10_Member	GO Biological Processes	GO:0007268	chemical synaptic transmission	-3.53379	-1.84365	2908,4208,5594,50488	NR3C1,MEF2C,MAPK1,MINK1	4/414
10_Member	GO Biological Processes	GO:0098916	anterograde trans-synaptic signaling	-3.53379	-1.84365	2908,4208,5594,50488	NR3C1,MEF2C,MAPK1,MINK1	4/414
10_Member	GO Biological Processes	GO:0099537	trans-synaptic signaling	-3.46753	-1.78788	2908,4208,5594,50488	NR3C1,MEF2C,MAPK1,MINK1	4/431
10_Member	GO Biological Processes	GO:0099536	synaptic signaling	-3.36069	-1.68851	2908,4208,5594,50488	NR3C1,MEF2C,MAPK1,MINK1	4/460
10_Member	GO Biological Processes	GO:0048167	regulation of synaptic plasticity	-3.16153	-1.50392	4208,5594,7532	MEF2C,MAPK1,YWHAG	3/221
10_Member	GO Biological Processes	GO:0002429	immune response-activating cell surface receptor signaling pathway	-3.01678	-1.36804	868,4208,5594	CBLB,MEF2C,MAPK1	3/248
10_Member	Reactome Gene Sets	R-HSA-1852241	Organelle biogenesis and maintenance	-2.78785	-1.15967	4208,7532,50807	MEF2C,YWHAG,ASAP1	3/298
10_Member	GO Biological Processes	GO:0002757	immune response-activating signaling pathway	-2.69584	-1.07348	868,4208,5594	CBLB,MEF2C,MAPK1	3/321
10_Member	GO Biological Processes	GO:0002253	activation of immune response	-2.46637	-0.85137	868,4208,5594	CBLB,MEF2C,MAPK1	3/387
11_Summary	GO Biological Processes	GO:0031349	positive regulation of defense response	-3.44857	-1.77174	4208,5595,7132,10666	MEF2C,MAPK3,TNFRSF1A,CD226	4/-
11_Member	GO Biological Processes	GO:0031349	positive regulation of defense response	-3.44857	-1.77174	4208,5595,7132,10666	MEF2C,MAPK3,TNFRSF1A,CD226	4/436
